1

## **Senescence: Still an Unsolved Problem of Biology**

2

3

Mark Roper\*, Pol Capdevila & Roberto Salguero-Gómez

4

## 5 **Abstract**

6 Peter Medawar's 'An Unsolved Problem of Biology'<sup>1</sup> was one of several formal attempts to  
7 provide an explanation for the evolution of senescence, the increasing risk of mortality and  
8 decline in reproduction with age after achieving maturity. Despite *ca.* seven decades of  
9 theoretical elaboration aiming to explain the problem since Medawar first outlined it, we  
10 argue that this fundamental problem of biology remains unsolved. Here, we utilise  
11 demographic information<sup>2,3</sup> for 308 multicellular species to derive age-based trajectories of  
12 mortality and reproduction that provide evidence against the predictions of the classical, still  
13 prevailing, theories of ageing<sup>1,4,5,6</sup>. These theories predict the inescapability of senescence<sup>1,4</sup>,  
14 or its universality at least among species with a clear germ-soma barrier<sup>5,6</sup>. The patterns of  
15 senescence in animals and plants that we report contradict both of these predictions. With the  
16 largest ageing comparative dataset of these characteristics to date, we build on recent  
17 evidence<sup>7,8</sup> to show that senescence is not the rule, and highlight the discrepancy between  
18 existing evidence and theory<sup>7,8,9</sup>. We also show that species' age patterns of mortality and  
19 reproduction often follow divergent patterns, suggesting that organisms may display  
20 senescence for one component but not the other. We propose that ageing research will benefit  
21 from widening its classical theories beyond merely individual chronological age; key life  
22 history traits such as size, the ecology of the organism, and kin selection, may together play a  
23 hidden, yet integral role in shaping senescence outcomes.

24

## 25 **Main**

26 The evolution of senescence has long been explained by a collation of theories defining the  
27 ‘classical evolutionary framework of ageing’. The central logic common to the theories  
28 argues that the force of natural selection weakens with age<sup>1,4,5,6</sup>. Selection becomes too weak  
29 to oppose the accumulation of genes that negatively affect older age classes<sup>1</sup>, or favours these  
30 genes if they also have beneficial effects at earlier ages in life<sup>5</sup>, when the contribution  
31 individuals make to future populations is assumed to be greater. Selection, therefore, should  
32 favour resource investment into earlier reproduction rather than late-life maintenance<sup>6</sup>.  
33 Ultimately, these theories predict, directly<sup>4</sup> or indirectly<sup>1,5</sup>, that senescence is inescapable<sup>4</sup>, or  
34 at least inevitable in organisms with clear germline-soma separation<sup>5,6</sup>.

35 It takes one example to disprove any rule. Recently, a comparative description of  
36 demographic patterns of ageing in 46 species of animals, plants, and algae<sup>8</sup> contradicted the  
37 predictions of the classical evolutionary framework. Many of the examined species displayed  
38 negligible<sup>10</sup> or even negative<sup>11</sup> senescence, where the risk of mortality remains constant or  
39 decreases with age, and reproduction remains constant or increases with age. This mismatch  
40 between observations and expectations have rendered the classical evolutionary framework  
41 insufficient to explain the evolution of senescence across the tree of life. We now need to  
42 understand mechanisms behind such variation of ageing patterns<sup>9</sup>, and how prevalent such  
43 “exceptions” are to the rule of ageing.

44 Here, we utilise high-resolution demographic information for 48 animal<sup>2</sup> and 260  
45 plant<sup>3</sup> species worldwide to (i) provide a quantitative evaluation of the rates of actuarial  
46 senescence – the progressive age-dependent increase in mortality risk with age after  
47 maturation – across multicellular organisms, (ii) test whether the classical evolutionary  
48 framework explains the examined diversity of senescence rates, with special attention to

49 predictions from germ-soma separation, and (iii) propose how to widen the classical  
50 evolutionary framework of ageing to better encompass the tree of life.

51 First, we derived life tables<sup>12</sup> from a selection of species' matrix population models<sup>13</sup>,  
52 each of which are a summary of the population dynamics of the species in question under  
53 natural conditions (See Methods & Supplementary Information). We then quantified the rate  
54 of actuarial senescence on the survivorship trajectory of each species' life table  
55 using Keyfitz' entropy ( $H$ )<sup>14</sup>. This metric quantifies the spread and timing of mortality events  
56 in a cohort as individuals age, with  $H < 1$  indicating that most mortality occurs later in life  
57 (*i.e.* actuarial senescence), and  $H > 1$  indicating low mortality at advanced ages, whereby  
58 individuals may escape actuarial senescence (See Methods & Supplementary  
59 Information). Importantly,  $H$  is normalised by mean life expectancy, facilitating cross-species  
60 comparison to examine general patterns and plausible mechanisms.

61

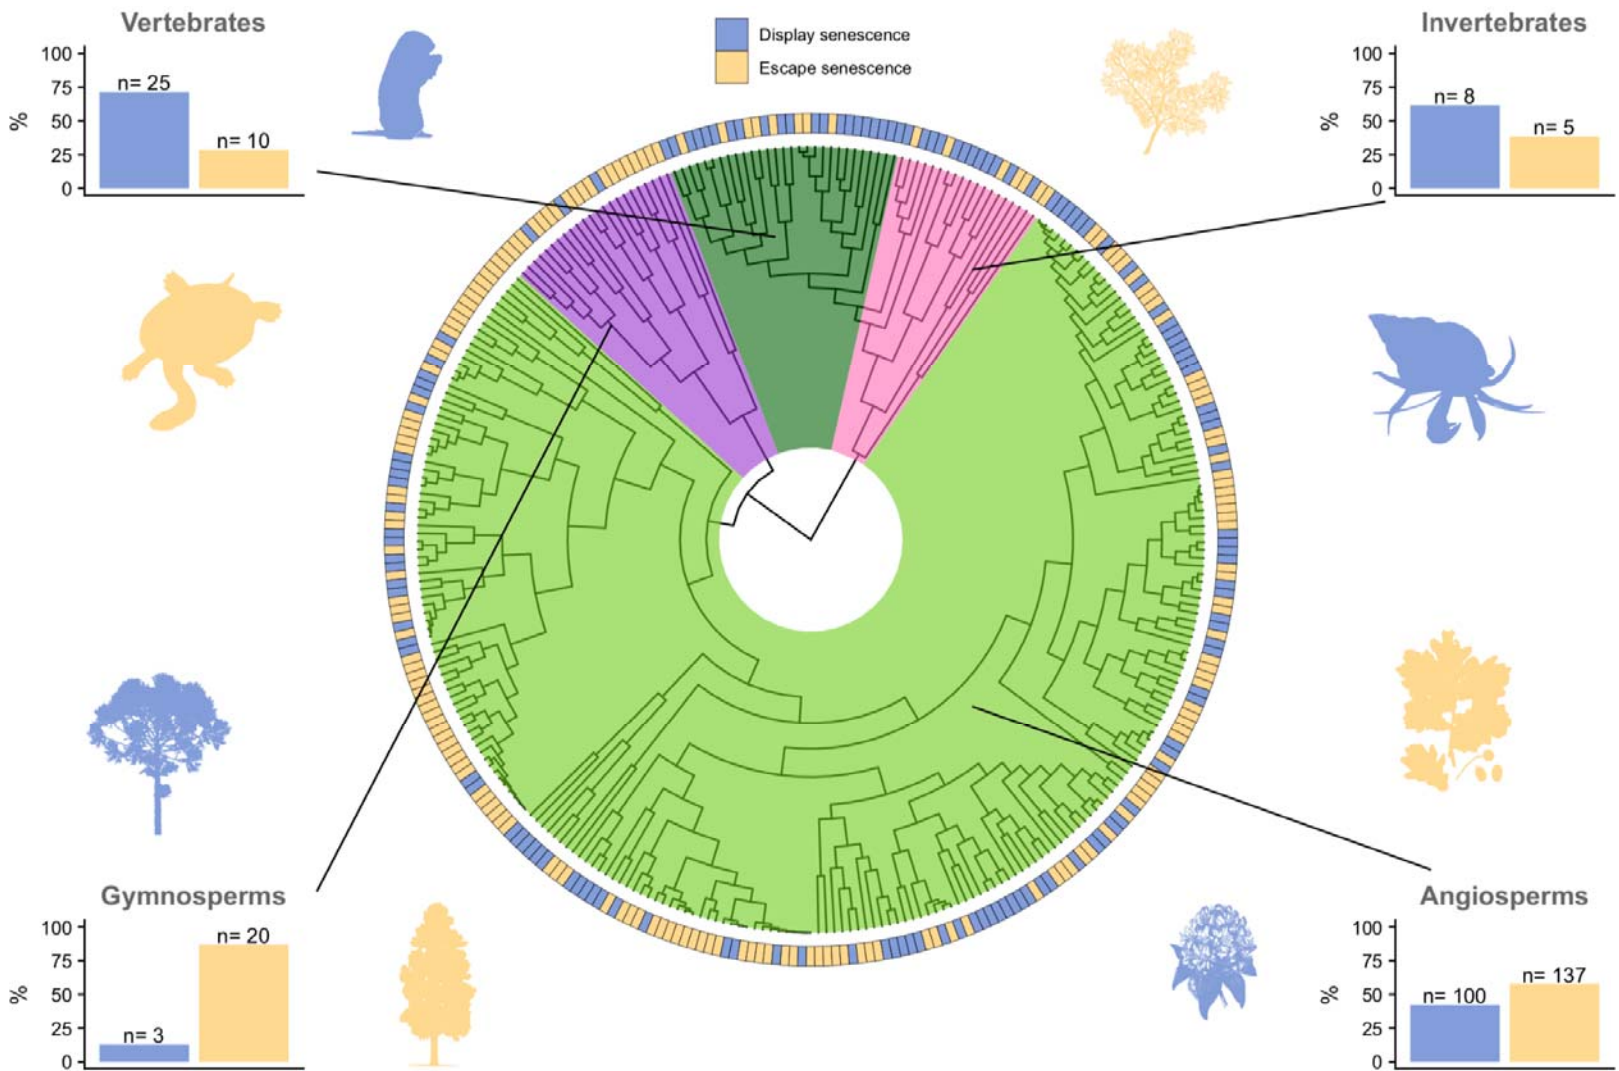

62 **Figure 1 The evolution of and escape from senescence across multicellular life.** The  
63 classical evolutionary framework of ageing does not explain the evolution of actuarial  
64 senescence across our 308 study species. Species that escape (yellow) and display (blue)  
65 senescence, as measured by Keyfitz' entropy ( $H$ )<sup>14</sup>, are dispersed throughout the four  
66 examined clades, with the percentages of each clade either displaying or escaping actuarial  
67 senescence shown in the bar charts. Depicted around the phylogeny are eight representative  
68 species, escaping (blue) and displaying (yellow), from each clade. Clockwise, these species  
69 are *Paramuricea clavata* (Invertebrate), *Pagurus longicarpus* (Invertebrate), *Quercus rugosa*  
70 (Angiosperm), *Rhododendron maximum* (Angiosperm), *Pinus lambertiana* (Gymnosperm),  
71 *Taxus floridana* (Gymnosperm), *Marmota flaviventris* (Vertebrate) and *Chelodina expansa*  
72 (Vertebrate).

73

74 Most of the species in our analysis do not display senescence (Fig. 1, Supplementary  
75 Table 1). These include approximately 30% (10/35) of the studied vertebrate species, which  
76 have a clear germ-soma separation, such as the broad-shelled river turtle (*Chelodina expansa*;  
77 Fig. 1). In contrast, 42% of vascular plants (angiosperms and gymnosperms), all lacking a  
78 clear germ-soma barrier, display senescence (Fig. 1). In general, the evolutionary history of a  
79 species in our study plays a relatively weak role in constraining its ability to escape/evolve  
80 senescence. Estimates of Pagel's  $\lambda$ <sup>15</sup>, a metric that measures how well phylogenetic  
81 relatedness predicts the variation of a trait across species (See Methods and Supplementary  
82 information) are generally weak (Extended Data Table 1), with the full analysis producing a  
83 Pagel's  $\lambda = 0.38$  (0.14-0.65, 95% C.I.). Overall, the emerging senescence landscape appears  
84 (i) not inescapable, (ii) not inevitable in species with a germ-soma barrier, and (iii) prevalent  
85 in species without a clear germ-soma barrier. These findings are in direct contradiction with  
86 the predictions of the classical evolutionary framework of ageing<sup>1,4,5,6</sup>.

87 The central assumption of the classical evolutionary framework of ageing, that the  
88 force of natural selection weakens with age, rests on the assumption that older individuals  
89 contribute less to future populations<sup>1,4,5,6</sup>. This is both because fewer individuals survive to  
90 later age classes<sup>1</sup>, and individuals are expected to favour reproduction at young rather than  
91 old ages<sup>1,5,6</sup>. To observe how different age classes contribute to future populations in our

92 study species, we use the derived life tables<sup>12</sup> to quantify age-specific reproduction rates  
93 ( $m(x)$ ) for species that we previously identified to display actuarial senescence ( $H < 1$ ) vs.  
94 those that do not ( $H > 1$ ) (See Methods & Supplementary information). The  $m(x)$  trajectories  
95 for all the species in our dataset can be found in Extended Data Fig. 1. For practicality, here,  
96 we provide the trajectories for the eight representative species across the four clades depicted  
97 in Figure 1.

98

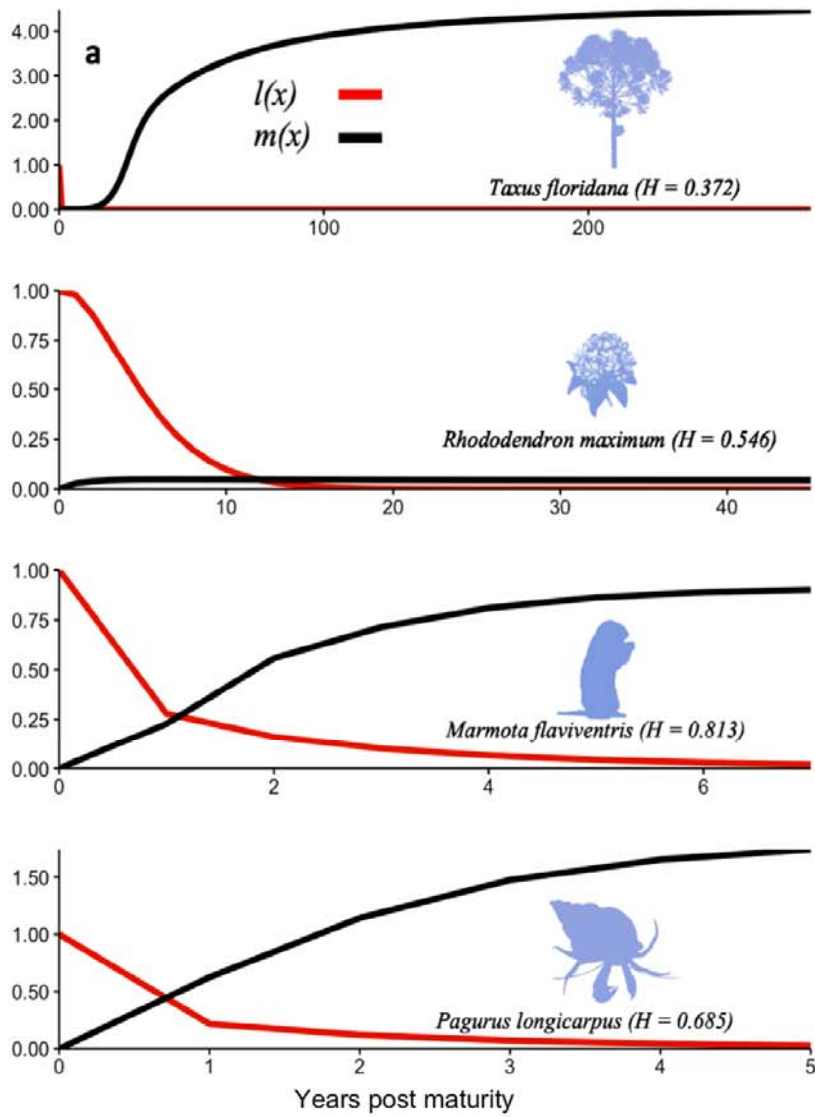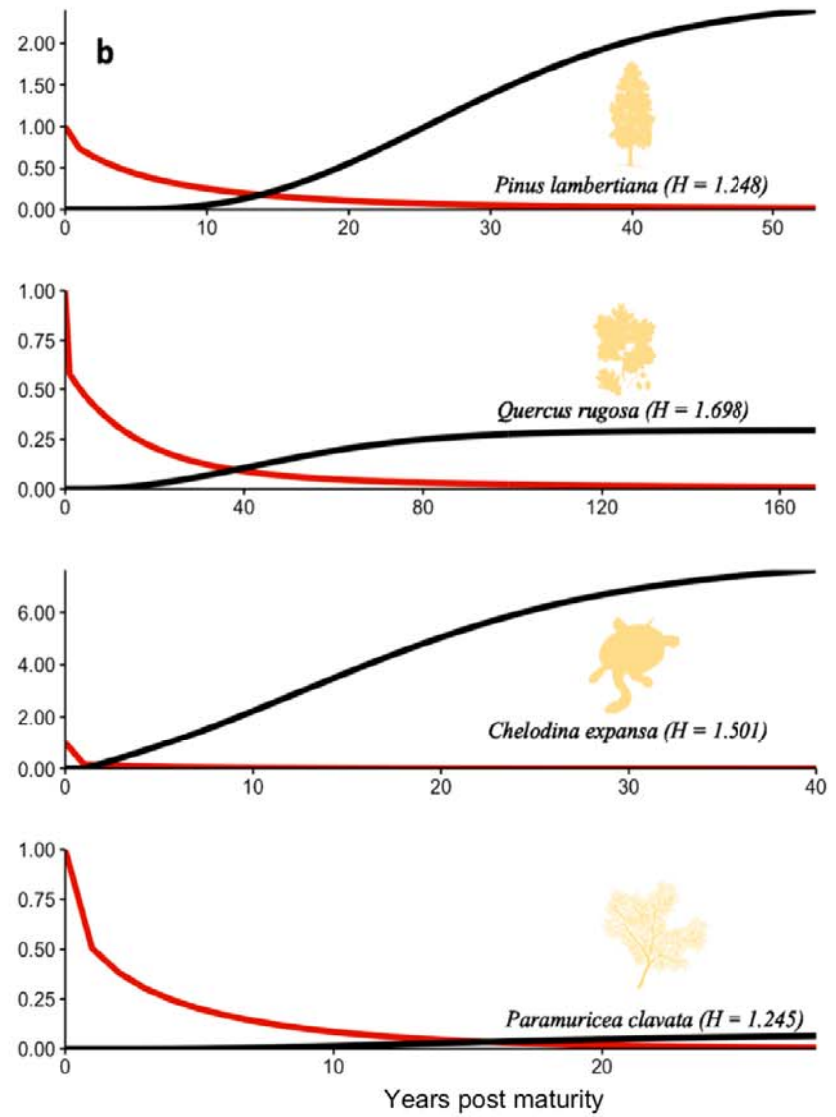



100 **Figure 2 Age-based patterns of survivorship ( $l(x)$  - red) and reproduction ( $m(x)$  - black)**  
101 **are often decoupled, as shown for a selected subset of the examined species in Figure 1.**  
102 **a)** Species quantified as displaying actuarial senescence ( $H < 1$ ) and **b)** species that escape  
103 actuarial senescence ( $H > 1$ ). Species are representative of vertebrates, invertebrates,  
104 gymnosperms, and angiosperms. Trajectories are conditional upon reaching the age of  
105 maturity, represented as 0, at which the mature cohort is defined to have entered adulthood  
106 with a survivorship of 1. The trajectories of  $l(x)$  and  $m(x)$  run from age at maturity to the age  
107 at which 5% of the mature cohort is still alive.

108

109 Classical theories of ageing predict that rates of reproduction should decline with  
110 age<sup>1,4,5,6</sup>. In our study species, however, patterns of  $m(x)$  are diverse and appear to be  
111 independent of whether the species displays or escapes actuarial senescence (Extended Data  
112 Fig. 1a-h). For instance, the long-wristed hermit crab (*Pagarus longicarpus*) displays  
113 actuarial senescence (Fig. 1), yet its reproduction increases with age (Fig. 2). Our results  
114 suggest that an individual's risk of mortality and rate of reproduction often follow different  
115 trajectories (Fig. 2, Extended Data Fig. 1a-h). For each species in our study, we only consider  
116 a single studied population, and so this decoupling cannot be an artefact of intra-specific  
117 variation across different populations. It follows that species may display actuarial  
118 senescence, but not reproductive senescence, and *vice versa*. Thus, we urge future work to  
119 consider that senescence is a two-component phenomenon of which, as displayed here, both  
120 are not destined to the same fate. To fully divulge the senescence profile of a species one  
121 must consider both mortality and reproduction.

122 Studies on reproductive senescence are sparser than their actuarial senescence  
123 counterparts. Although, important longitudinal investigations into reproductive senescence  
124 have been conducted<sup>16,17,18</sup>, and current data suggest that rates of reproduction, like mortality  
125 hazards, can also both increase or decrease with age. Our results support observations that  
126 patterns of reproduction are variable across species (Fig. 2, Extended Data Fig. 1).  
127 Developing a methodology to quantify these senescence patterns of reproduction, as done

128 here using Keyfitz' entropy<sup>14</sup> ( $H$ ) for actuarial senescence, should be a focus of future  
129 theoretical work to unearth when, where, and what mechanisms drive how tightly the two  
130 components of senescence co-vary.

131 In general, our results display the discrepancy between the predictions of the classical  
132 evolutionary framework of ageing and empirical data. We suggest that researchers must  
133 widen the framework to better encompass the biology of a more diverse range of taxa. For  
134 example, the models of the classical evolutionary framework are purely age-structured, yet,  
135 in some species, demographic patterns of survival and reproduction may be influenced  
136 equally or even more by factors besides age<sup>13</sup>. Indeed, the force of selection does not always  
137 decline with age for some species<sup>19</sup>. These organisms display demographic trajectories of  
138 survival and reproduction that are better predicted by size rather than age, such as many  
139 plants<sup>20</sup>, which is supported by the 58% of studied plant species here that escape senescence,  
140 or corals<sup>21</sup> (e.g. *Paramuricea clavata*; Fig. 1).

141 Many of the predictions made explicit from the classical framework of ageing have,  
142 until recently, long stood the test of time. Higher rates of extrinsic mortality, *i.e.* deaths due to  
143 the background environment, are expected to accelerate rates of senescence, whereas juvenile  
144 mortality is predicted not to play a role in the evolution of senescence<sup>5</sup>. Theoretical  
145 advancements, however, have shown that to have a significant effect, extrinsic mortality must  
146 be age-dependent<sup>22</sup>. Also, by biasing the stable age distribution of a population towards  
147 younger ages, high birth rate can also reduce the strength of selection with age<sup>23</sup>. The strength  
148 of selection at a given age is dependent on both the abundance of individuals in a given age  
149 class *and* the respective reproductive value of that age class<sup>4,23</sup>. Following this logic, some  
150 species that display senescence yet retain high reproduction at old ages (e.g. *Marmota*  
151 *flaviventris* or *Pagurus longicarpus*; Fig. 1, Fig. 2) may have a stable age distribution biased  
152 towards younger individuals. This outcome would render selection too weak to promote an

153 escape from senescence. Ultimately, how the environment shapes patterns of birth and deaths  
154 will dictate both the reproductive value of age classes and the stable age-distribution of the  
155 classes. In turn, the resulting dynamics of these pressures will affect the relative strengths of  
156 age-specific selection gradients<sup>24</sup> for mortality and reproduction, and therefore patterns of  
157 senescence.

158 Finally, we have only considered patterns of survival and reproduction with respect to  
159 effects on the focal individual. If an individual's survival and/or reproduction affects the  
160 fitness of others, however, and the interacting individuals are relatives, selection on the  
161 demographic age trajectories will also be weighted by these effects<sup>25</sup>. In our study, for  
162 example, the killer whale (*Orcinus orca*) experiences negligible actuarial senescence ( $H =$   
163 0.999) (Extended Data Fig. 1a). Killer whales are an exemplar where post-reproductive  
164 survival is hypothesised to have evolved due to the positive effects individuals can have on  
165 the survival and reproduction of offspring, *i.e.* 'grandmother hypothesis'<sup>4,5,26</sup>. This is  
166 consistent with our results. Further evidence is also beginning to accrue elsewhere that  
167 sociality may have an important role in driving patterns of senescence beyond the remits of  
168 'grandmothering'<sup>27,28</sup>.

169 The emerging picture of senescence across multicellular organisms is at odds with the  
170 widely cited predictions of the classical evolutionary framework<sup>1,4,5,6</sup>. What drives the  
171 evolution of senescence has attracted the attention of a vast research community, but we  
172 propose that the field would benefit immensely if the attention is shifted towards the  
173 underlying mechanisms allowing species to escape from senescence. We expect the greatest  
174 progress to be made by researchers honing their focus to widening the classic evolutionary  
175 theories to a framework not solely focused on age, but instead inclusive of the  
176 aforementioned factors and with a special focus on actuarial and reproductive senescence as  
177 potentially differing trajectories. Most ageing research likely stems from human desire to

178 increase human health and life span<sup>29</sup>. This desire requires understanding the variation in  
179 patterns of senescence across the tree of life. For now, senescence remains an unsolved  
180 problem of biology.

## 181 **Methods**

182

### 183 **Data**

184 We used the COMADRE Animal Matrix Database<sup>2</sup> (v. 3.0.0) and COMPADRE Plant Matrix  
185 Database<sup>3</sup> (v. 5.0.0) to obtain age trajectories of survival and reproduction. These open-access  
186 data repositories consist of matrix population models<sup>13</sup> (MPMs) incorporating high-resolution  
187 demographic information on the survival and reproduction patterns of over 1,000 animal and  
188 plant species worldwide<sup>2,3</sup>. Both databases include information on species for which the data  
189 have been digitised and thoroughly error-checked. In addition, we contacted authors for  
190 clarifications when any doubt about the interpretation of the life cycle of the species emerged.  
191 We imposed a series of selection criteria to restrict our analyses to data of the highest quality  
192 possible.

- 193 (i) MPMs were parameterised with field data from non-disturbed, unmanipulated  
194 populations (*i.e.* natural populations) to best describe the species' age trajectories.
- 195 (ii) MPMs had dimension  $\geq 3 \times 3$  (*i.e.* rows  $\times$  columns). Generally, low dimensions  
196 MPMs lack quality for the estimation of life history traits<sup>30</sup>. This selection  
197 criterion also helps avoid problems with quick convergence to stationary  
198 equilibrium, at which point the estimates of life history trait values and rates of  
199 senescence become unreliable<sup>8,31</sup>.
- 200 (iii) MPMs were only used when the entire life cycle was explicitly modelled  
201 including recordings of survival, development, and reproduction for all life cycle  
202 stages.

- 203 (iv) When MPMs existed for multiple populations within a given species, we  
204 calculated the arithmetic element-by-element mean MPM to obtain a single MPM  
205 per species.
- 206 (v) When multiple studies existed for the same species, we considered only the study  
207 of greater duration to ensure the highest temporal variation in the population  
208 dynamics was captured.
- 209 (vi) Studies of annual plant species modelled using seasonal projection matrices were  
210 not included; we chose only species using an annual time step. This is due to the  
211 difficulties of converting their population dynamics to an annual basis to compare  
212 with all other species' models.
- 213 (vii) Included MPMs have stage-specific survival values  $\leq 1$ . In a small number of  
214 published models, the stage-specific survival values can exceed 1 due to clonality  
215 being hidden in the matrix, rounding errors, or other mistakes in the original  
216 model<sup>2,3</sup>.
- 217 (viii) MPMs were from species of which phylogenetic data was available, to ensure we  
218 were able to account for phylogenetic relatedness on our models.

219 The result of these criteria was a subset of 308 species of animals and plants from the  
220 initial databases, which we used for our analysis. Of these, 48 were animals, with 13  
221 invertebrates and 35 vertebrates. The remaining 260 species were plants, with 23  
222 gymnosperms and 237 angiosperms. We provide a list of all the species used, their  
223 categorisation as displaying or escaping senescence including value of  $H$ , and their relevant  
224 source study (Supplementary Table 1).

225

## 226 **Displaying vs escaping senescence**

227 MPMs are a summary of the population dynamics of a given species, from which we can  
228 calculate several life history traits. To do so, we first must decompose an MPM ( $A$ ) into its  
229 sub-components<sup>13</sup>:

230  $U$  – containing the stage-specific survival rates

231  $F$  – containing the stage-specific per-capita reproduction rates

232  $C$  – containing stage-specific per-capita clonality rates

233 
$$A = U + F + C \quad \text{equation 1}$$

234 This decomposition facilitates the estimation of key life history traits, including  
235 Keyfitz' entropy ( $H$ )<sup>14</sup>. Calculating  $H$  requires first obtaining the age-specific survivorship  
236 curve  $l(x)$  from  $U$ . First, the definition of age requires a choice of a stage that corresponds to  
237 “birth”. Following Jones *et al.*<sup>8</sup>, we defined the stage corresponding to birth as the first  
238 established non-propagule stage (e.g., not seeds or seed bank in the case of plants, nor larvae  
239 or propagules in animals) due to the estimate uncertainty of parameters involved in those  
240 stages. The calculation of  $l(x)$  was then implemented according to Caswell (p. 118-21)<sup>13</sup>.

241 
$$l(x) = e^t U^x e^j \quad x = 0, 1, \dots \quad \text{equation}$$

242 2

243 We considered survivorship trajectories beginning at the age of maturity (calculated  
244 following 5.47–5.54 in Caswell<sup>13</sup>) and ending at the age at which 5% survivorship from  
245 maturity occurs. This is because a cohort modelled by iteration of the  $U$  matrix eventually  
246 decays exponentially at a rate given by the dominant eigenvalue of  $U$ , and converges to a  
247 quasi-stationary distribution given by the corresponding right eigenvector  $\mathbf{w}$ . Once this  
248 convergence has happened, mortality remains constant with age, and so to prevent our  
249 conclusions being overly influenced by this assumption, we calculated the age at which the  
250 cohort had converged to within a specified percentage (5%) of the quasi-stationary  
251 distribution<sup>8,31</sup>.

252  $H$  is proportional to the area under the age-specific survivorship curve and is  
253 calculated as follows

$$254 \quad H = \frac{-\log(lx)lx}{\sum lx} \quad \text{equation 3}$$

255 If most mortality occurs later in life,  $H < 1$ , and individuals in the population display  
256 actuarial senescence. On the contrary, if  $H > 1$ , the risk of mortality declines with age and the  
257 individuals in the population escape actuarial senescence. Here, we categorise species as  
258 either escaping or displaying senescence, however, values of  $H \sim 1$  are more likely to indicate  
259 negligible senescence, where risk of mortality remains relatively constant with age.

260

### 261 **Phylogenetic analyses for actuarial senescence**

262 After categorising species as displaying ( $H < 1$ ) or escaping ( $H > 1$ ) senescence, we accounted  
263 for the phylogenetic relatedness of the species studied to determine the influence of a species'  
264 evolutionary history in its likelihood of evolving or escaping senescence. To build the  
265 phylogenetic tree with the species included in this study, we used data from the Open Tree of  
266 Life<sup>32</sup> (OTL), a database that combines public available taxonomic and phylogenetic  
267 information across the tree of life. We first checked that the species names in our data were  
268 taxonomically accepted using the *taxize* R package<sup>33</sup>. Then, we obtained animal and plant  
269 phylogenetic trees from OTL for the list of species in our data using *rotl* R package<sup>34</sup>. The  
270 branch length of the resulting tree was computed using the *compute.brlen* function from the R  
271 package *ape*<sup>35</sup>, with Grafen's<sup>36</sup> arbitrary branch lengths. Polytomies (*i.e.*  $> 2$  species with the  
272 same ancestor) were resolved using the function *multi2di* from *ape* package<sup>35</sup>, which  
273 transforms polytomies into a series of random dichotomies with one or several branches of  
274 length zero.

275 To evaluate the role of phylogenetic relatedness in determining the patterns of  
276 variation of actuarial senescence we estimated Pagel's  $\lambda$ <sup>15</sup>. This metric is an index bounded

277 between zero and one, where values  $\sim 0$  indicate that the evolutionary history of the species  
278 explains little about the variation of the trait measured, and values  $\sim 1$  suggest that that  
279 evolutionary history mostly explains the observed variation of the trait across the studied  
280 species. To estimate Pagel's  $\lambda$  we used the R package *motmot.2.0*<sup>37</sup>. A full summary of the  
281 phylogenetic signals obtained for each of the four monophyletic groups can be found in the  
282 Extended Data and Figures (Table 1).

### 283 **Reproduction analysis**

284 We calculated reproductive age-trajectories for the species in our analysis to investigate  
285 whether reproductive senescence followed the same pattern as actuarial senescence in species  
286 that display *vs.* escape actuarial senescence. Age-specific reproduction ( $m(x)$ ) was calculated  
287 following Caswell (p. 118-21)<sup>13</sup>. Briefly, the proportional structure of the cohort at age  $x$  is  
288 given by

$$289 \quad \mathbf{p}(x) = \frac{U^x \mathbf{e}_j}{\mathbf{e}^T U^x \mathbf{e}_j} \quad x = 0, 1, \dots \quad \text{equation 4}$$

290 The total sexual reproductive output per individual at age  $x$  is given by

$$291 \quad m(x) = \mathbf{e}^T \mathbf{F} \mathbf{p}(x) \quad \text{equation 5}$$

292

293 For two species, *Araucaria mulleri* and *Juniperus procera*,  $m(x)$  was incalculable, and  
294 so both species'  $l(x)$  and  $m(x)$  trajectories are not reported. For the remaining 306 species, the  
295  $l(x)$  and  $m(x)$  trajectories are found in the Extended Fig. 1a-h.

296



297 **Code availability**

298 Code used for analysis is available in the supplementary information.

299 **Data availability**

300 Data are available from the source data files in the supplementary information and from the

301 COMPADRE Plant Matrix Database and COMADRE Animal Matrix Database

302 ([www.compadre-db.com](http://www.compadre-db.com)).

303

## 304 **References**

- 305 1. Medawar, P. B. *An unsolved problem of biology* (H. K. Lewis, 1952).
- 306 2. Salguero-Gómez, R. *et al.* COMADRE: a global database of animal demography. *J.*  
307 *Anim. Ecol.* **85**, 371-385 (2016).
- 308 3. Salguero-Gómez, R. *et al.* The COMPADRE plant matrix database: an open online  
309 repository for plant demography. *J Ecol.* **103**, 202–218 (2015).
- 310 4. Hamilton, W. D. The moulding of senescence by natural selection. *J. Theor. Biol.* **12**,  
311 12–45 (1966).
- 312 5. Williams, G. Pleiotropy, natural selection, and the evolution of senescence. *Evolution*  
313 **11**, 398–411 (1957).
- 314 6. Kirkwood, T. B. L. Evolution of ageing. *Nature* **270**, 301–304 (1977).
- 315 7. Jones, O.R., & Vaupel J.W. Senescence is not inevitable. *Biogerontology* **18**, 965-971  
316 (2017).
- 317 8. Jones, O.R. *et al.* Diversity of ageing across the tree of life. *Nature* **505**, 169- 174  
318 (2014).
- 319 9. Baudisch, A. & Vaupel, J.W. Getting to the root of aging. *Science* **338**, 618–619  
320 (2012).
- 321 10. Finch, C. E. *Longevity, Senescence and the Genome* (Univ. Chicago Press, 1994).
- 322 11. Vaupel, J. W., Baudisch, A., Do'lling, M., Roach, D. A. & Gampe, J. The case for  
323 negative senescence. *Theor. Popul. Biol.* **65**, 339–351 (2004).
- 324 12. Chiang, C. L. *The life table and its applications* (Krieger Publishing, 1984).
- 325 13. Caswell, H. *Matrix Population Models* (Sinauer Associates, 2001).
- 326 14. Keyfitz, N. *Applied Mathematical Demography* (John Wiley and Sons, 1977).
- 327 15. Pagel, M. Inferring the historical patterns of biological evolution. *Nature.* **401**, 877-  
328 884 (1999).

- 329 16. Jones, O.R. *et al.* Senescence rates are determined by ranking on the fast-slow life-  
330 history continuum. *Ecology Letters*. **11(7)**, 664-673 (2009).
- 331 17. Lemaître, J-F. & Gaillard, J-M. Reproductive senescence: new perspectives in the  
332 wild. *Biol. Rev.* **92(4)**, 2182-2199 (2017).
- 333 18. Barneche, D.R., Robertson, D.R., White, C.R. & Marshall, D.J. Fish reproductive-  
334 energy output increases disproportionately with body size. *Science*. **360**, 642-645  
335 (2018).
- 336 19. Caswell, H. & Salguero-Gomez, R. Age, stage and senescence in plants. *J.*  
337 *Ecol.* **101**, 585–595 (2013).
- 338 20. Baudisch, A. *et al.* The pace and shape of senescence in angiosperms. *J. Ecol.* **101**,  
339 596-606 (2013).
- 340 21. Hughes, T. P. Population dynamics based on individual size rather than age: a general  
341 model with a reef coral example. *Am. Nat.* **123**, 778-795 (1984).
- 342 22. Caswell, H. Extrinsic mortality and the evolution of senescence. *Trends in Ecology*  
343 *and Evolution*. **22**, 173–174 (2007).
- 344 23. Wensink, M.J., Caswell, H. & Baudisch, A. The Rarity of Survival to Old Age Does  
345 Not Drive the Evolution of Senescence. *Evol. Biol.* **44**, 5-10 (2017).
- 346 24. Lande, L. A quantitative genetic theory of life history evolution. *Ecology*. **63**, 607–  
347 615. (1982).
- 348 25. Bourke, A.F.G. Kin Selection and the Evolutionary Theory of Aging. *Ann. Rev. Ecol.*  
349 *Evo. Syst.* **38**, 103-128 (2007).
- 350 26. Hawkes, K., O’Connell, J. F., Blurton-Jones, N. G., Alvarez, H. & Charnov, E. L.  
351 Grandmothering, menopause, and the evolution of human life histories. *Proc. Natl*  
352 *Acad. Sci. USA*. **95**, 1336–1339 (1998).

- 353 27. Berger, V., Lemaître, J-F., Allainé, D., Gaillard, J-M. & Cohas, A. Early and Adult  
354 Social Environments Shape Sex-Specific Actuarial Senescence Patterns in a  
355 Cooperative Breeder. *Am. Nat.* **192:4**, 525-536 (2018).
- 356 28. Hammers, M. *et al.* Breeders that receive help age more slowly in a cooperatively  
357 breeding bird. *Nature Communications.* **10:1301** (2019).
- 358 29. Jones, O.R. & Salguero- Gómez, R. Life History Trade-Offs Modulate the Speed of  
359 Senescence. *The Evolution of Senescence in the Tree of Life*. Eds. Shefferson, R.P.,  
360 Jones, O.R. & Salguero-Gómez, R. (Cambridge University Press, 2017).
- 361 30. Salguero-Gómez, R. & Plotkin, JB. Matrix dimensions bias demographic inferences:  
362 implications for comparative plant demography. *Am Nat.* **176(6)**, 710-72. (2010).
- 363 31. Horvitz C.C., Tuljapurkar, S. Stage dynamics, period survival, and mortality plateaus.  
364 *Am Nat.* **172**, 203–215. (2009).
- 365 32. Hinchliff, C. E. et al. Synthesis of phylogeny and taxonomy into a comprehensive tree  
366 of life. *Proc. Natl. Acad. Sci.* **112**, 201423041 (2015).
- 367 33. Chamberlain, S.A. & Szöcs, E. taxize: taxonomic search and retrieval in R.  
368 *F1000Research.* (2013).
- 369 34. Michonneau, F., Brown, J. & Winter, D. rotl, an R package to interact with the Open  
370 Tree of Life data. *Methods Ecol. Evol.* 1–17. (2016).
- 371 35. Paradis, E., Claude, J. & Strimmer, K. APE: Analyses of phylogenetics and evolution  
372 in R language. *Bioinformatics.* **20**, 289–290. (2004).
- 373 36. Grafen, A. The phylogenetic regression. *Phil. Trans. R. Soc. Lond. B.* **326**, 119–157.  
374 (1989).
- 375 37. Puttick, M. et al. motmot.2.0: Models of Trait Macroevolution on Trees. R package  
376 version 1.1.2. (2018)

377

378 **Acknowledgements**

379 M.R was supported by funding from the Biotechnology and Biological Sciences Research  
380 Council (BBSRC) [grant number BB/M011224/1]. P.C. was supported by a Ramón Areces  
381 Foundation Postdoctoral Scholarship. This research emerged through funding by NERC  
382 R/142195-11-1 to R.S-G.

383

384 **Author information**

385 **Affiliations**

386 *Department of Zoology, University of Oxford, 11a Mansfield Road, Oxford, OX1 3SZ, UK.*

387 Mark Roper, Pol Capdevila & Roberto Salguero-Gómez

388 *Centre for Biodiversity and Conservation Science, University of Queensland, St Lucia 4071*

389 *QLD, Australia.*

390 Roberto Salguero-Gómez

391 *Evolutionary Demography laboratory, Max Plank Institute for Demographic Research,*

392 *Rostock 18057, Germany.*

393 Roberto Salguero-Gómez

394 **Contributions**

395 M.R. and R.S.G. conceived the project. M.R. and P.C conducted the analysis and produced

396 all visualizations. M.R drafted the first version and together with P.C. and R.S.-G., revised

397 and edited the manuscript.

398 **Competing interests**

399 The authors declare no competing interests.

400 **Corresponding author**

401 Correspondence to Mark Roper, Email [mark.roper@keble.ox.ac.uk](mailto:mark.roper@keble.ox.ac.uk)

402

403 **Extended data figures and tables**

404 **Fig. 1: Survivorship (red) and reproduction (black) age-trajectories for 306 of our study**  
405 **species. a)** Invertebrates that escape senescence **b)** Vertebrates that escape senescence **c)**  
406 Invertebrates that display senescence **d)** Vertebrates that escape senescence **e)** Gymnosperms  
407 that escape senescence **f)** Gymnosperms that display senescence **g)** Angiosperms that escape  
408 senescence **h)** Angiosperms that display senescence. Trajectories are conditional upon  
409 reaching, and are shown from, the age of maturity, labelled as 0, to the age at which 5% of  
410 the mature cohort is still alive. The mature cohort is defined to have survivorship of 1.

411

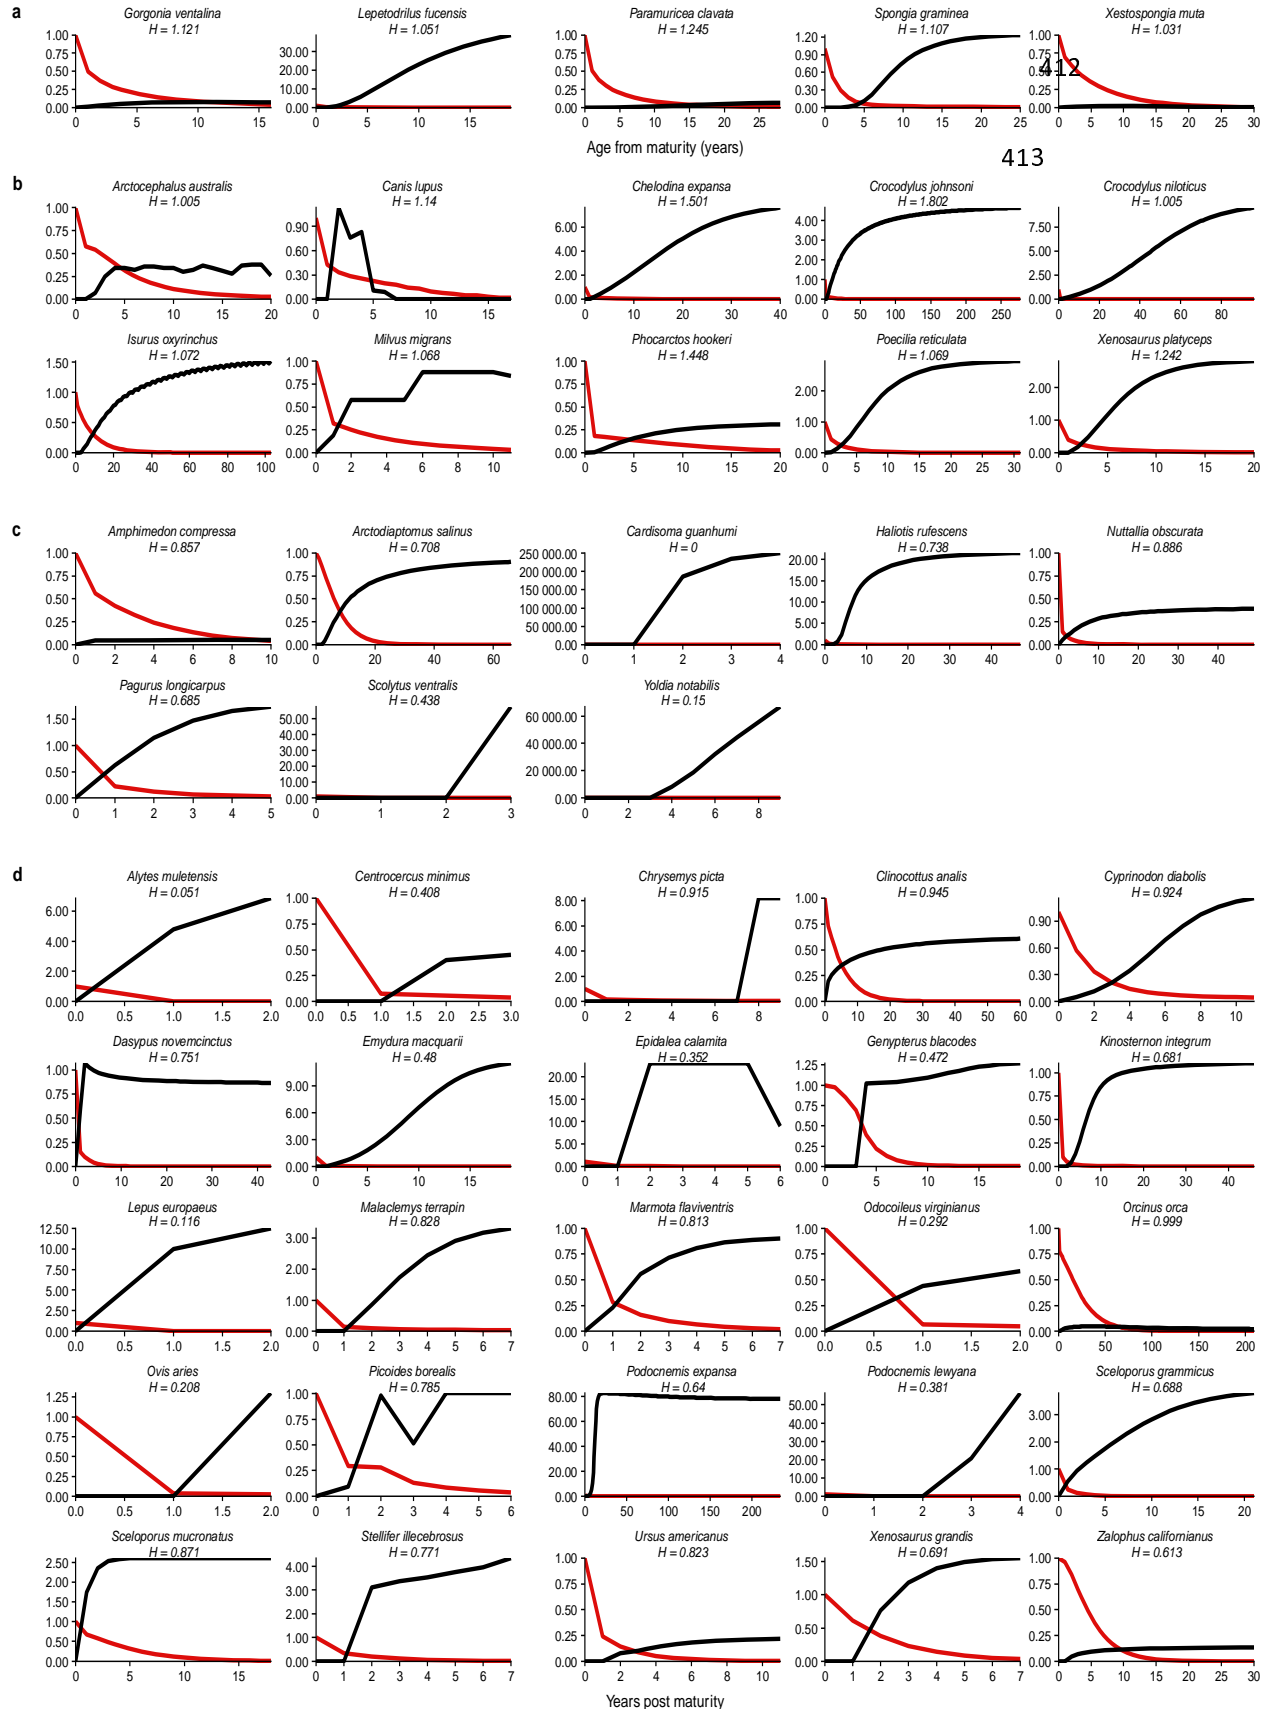

413



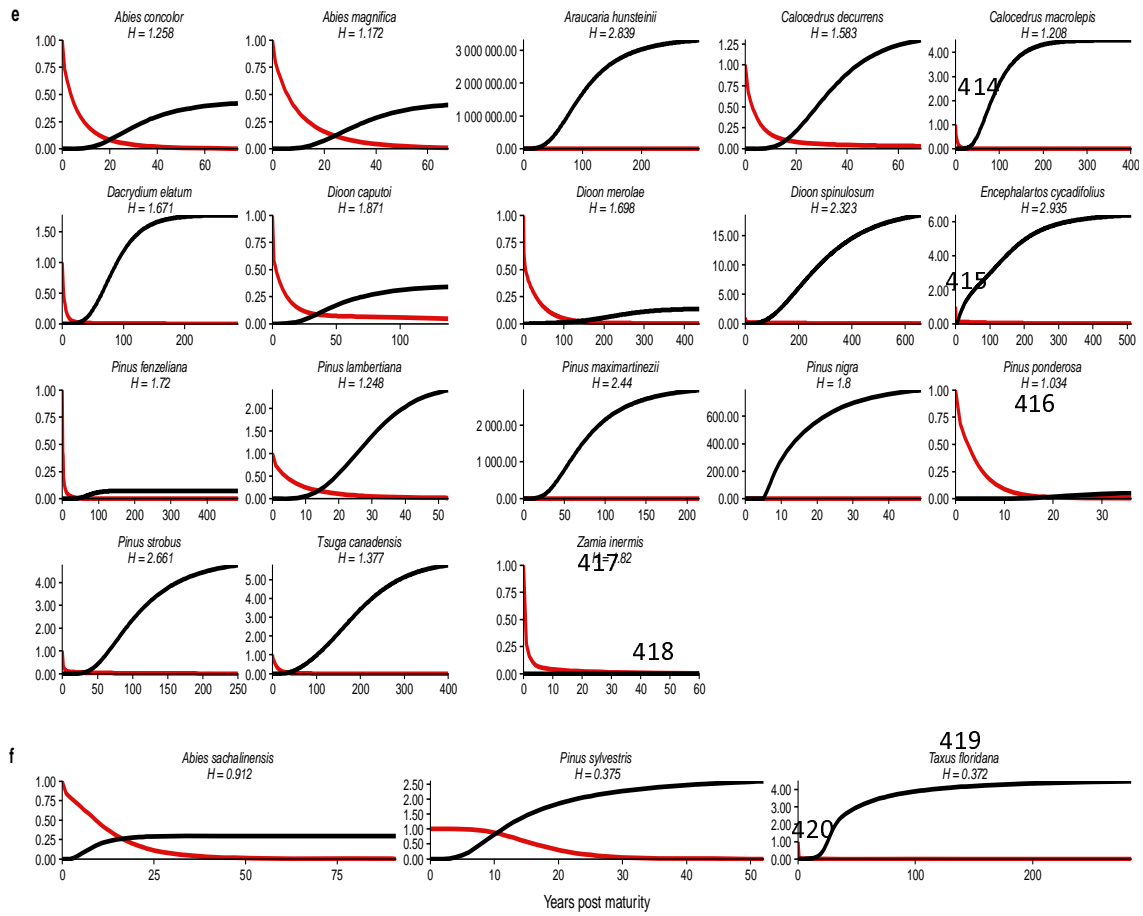

421

422

g

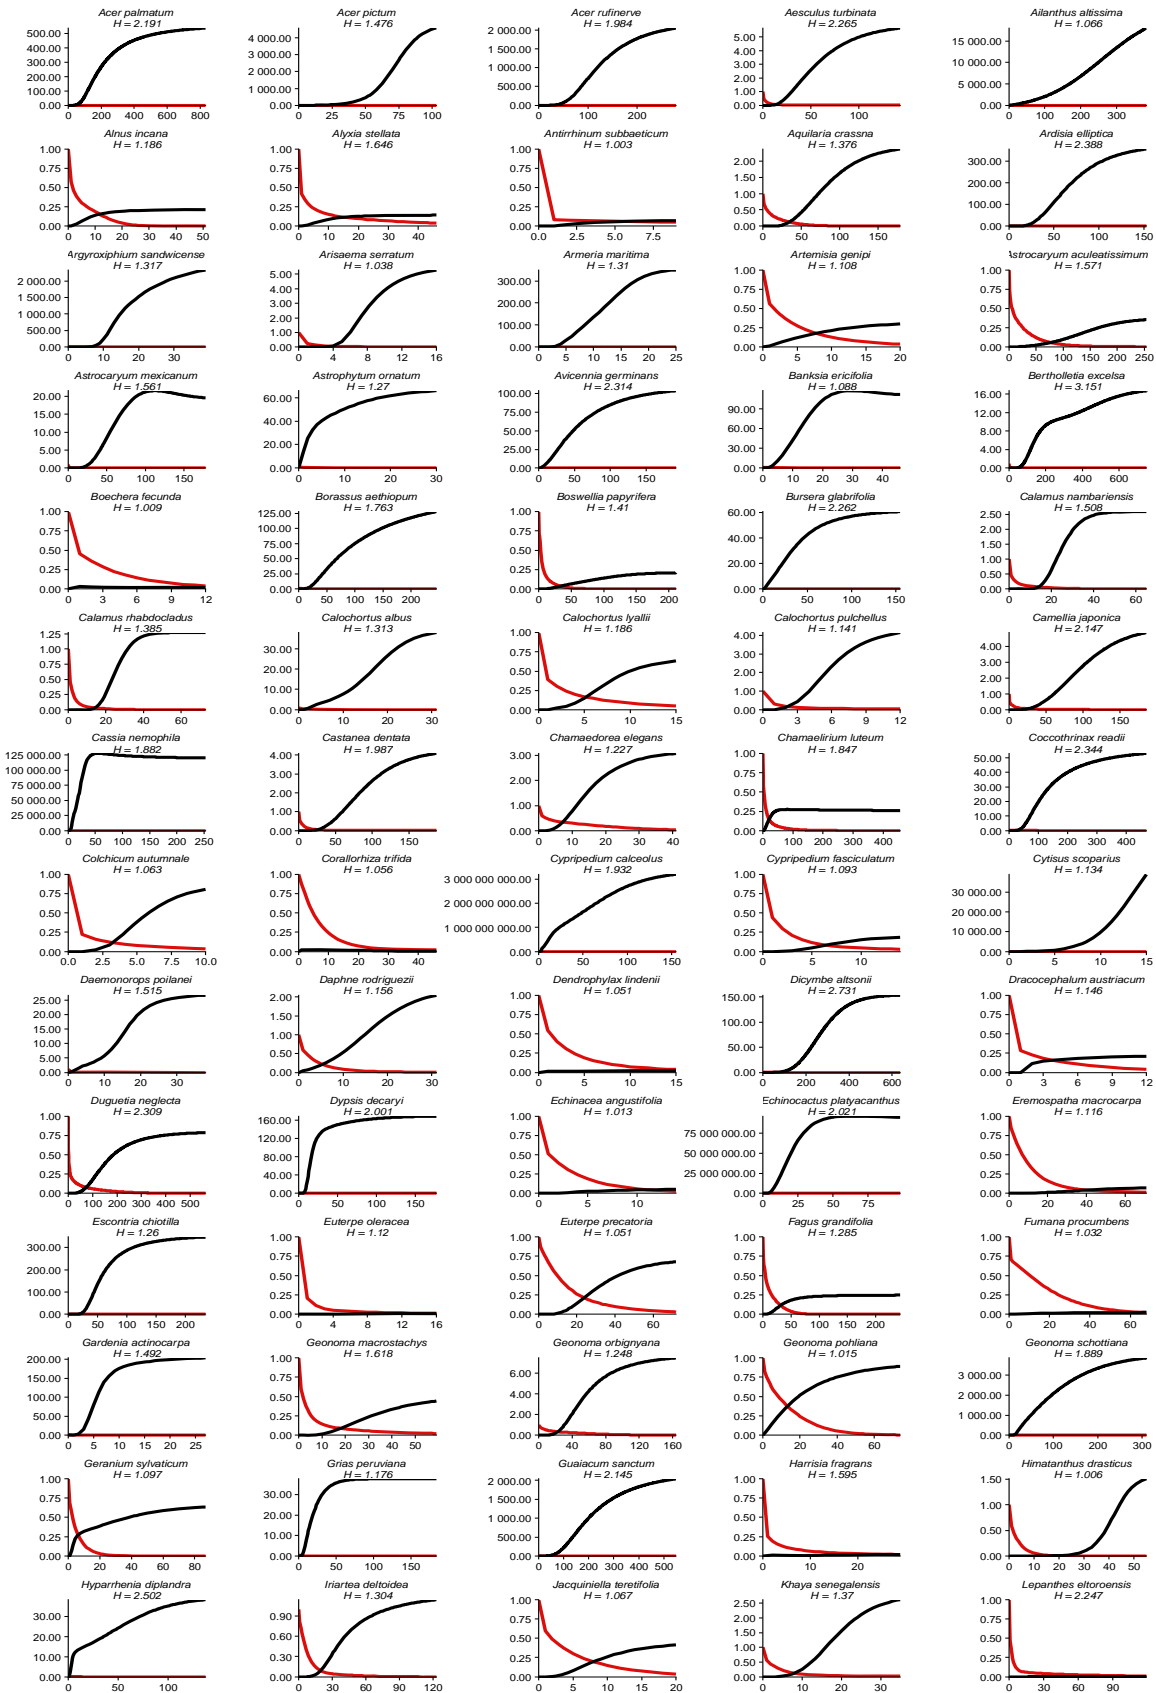

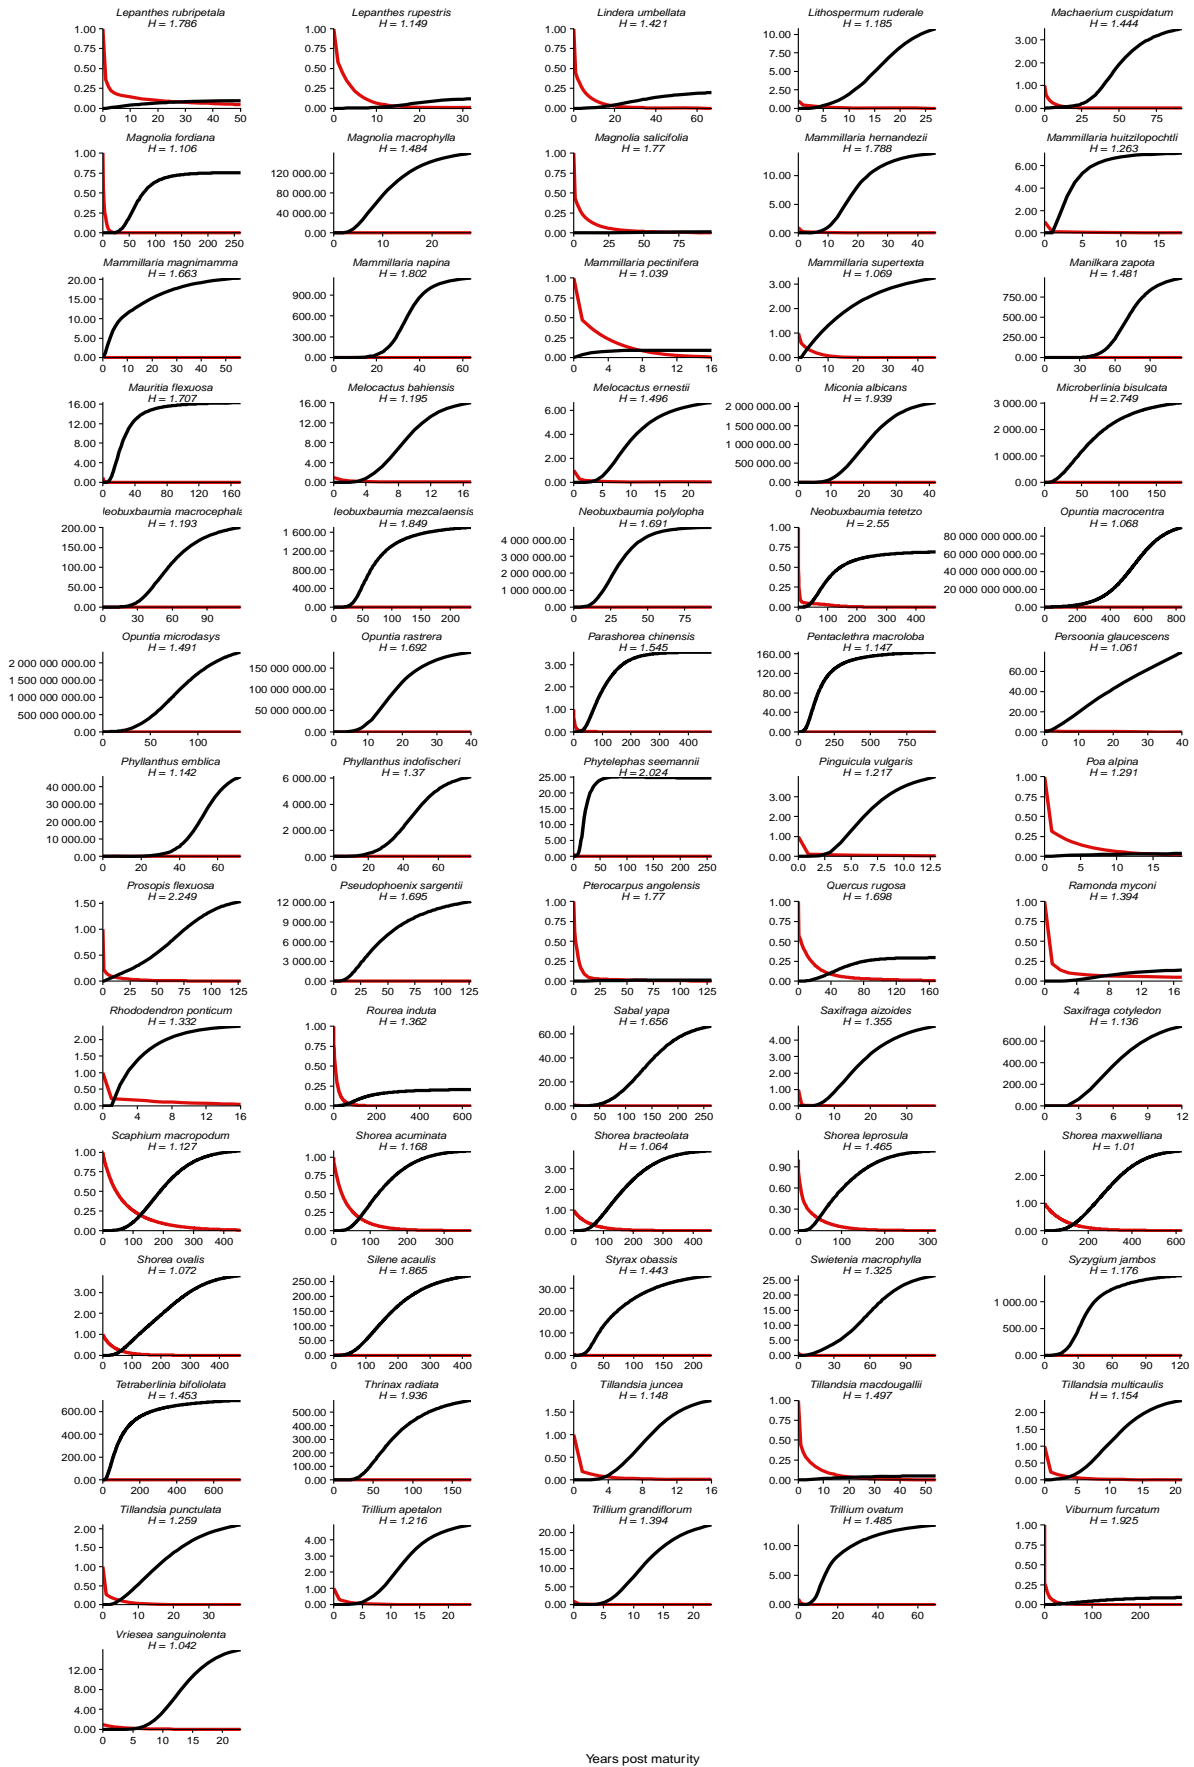

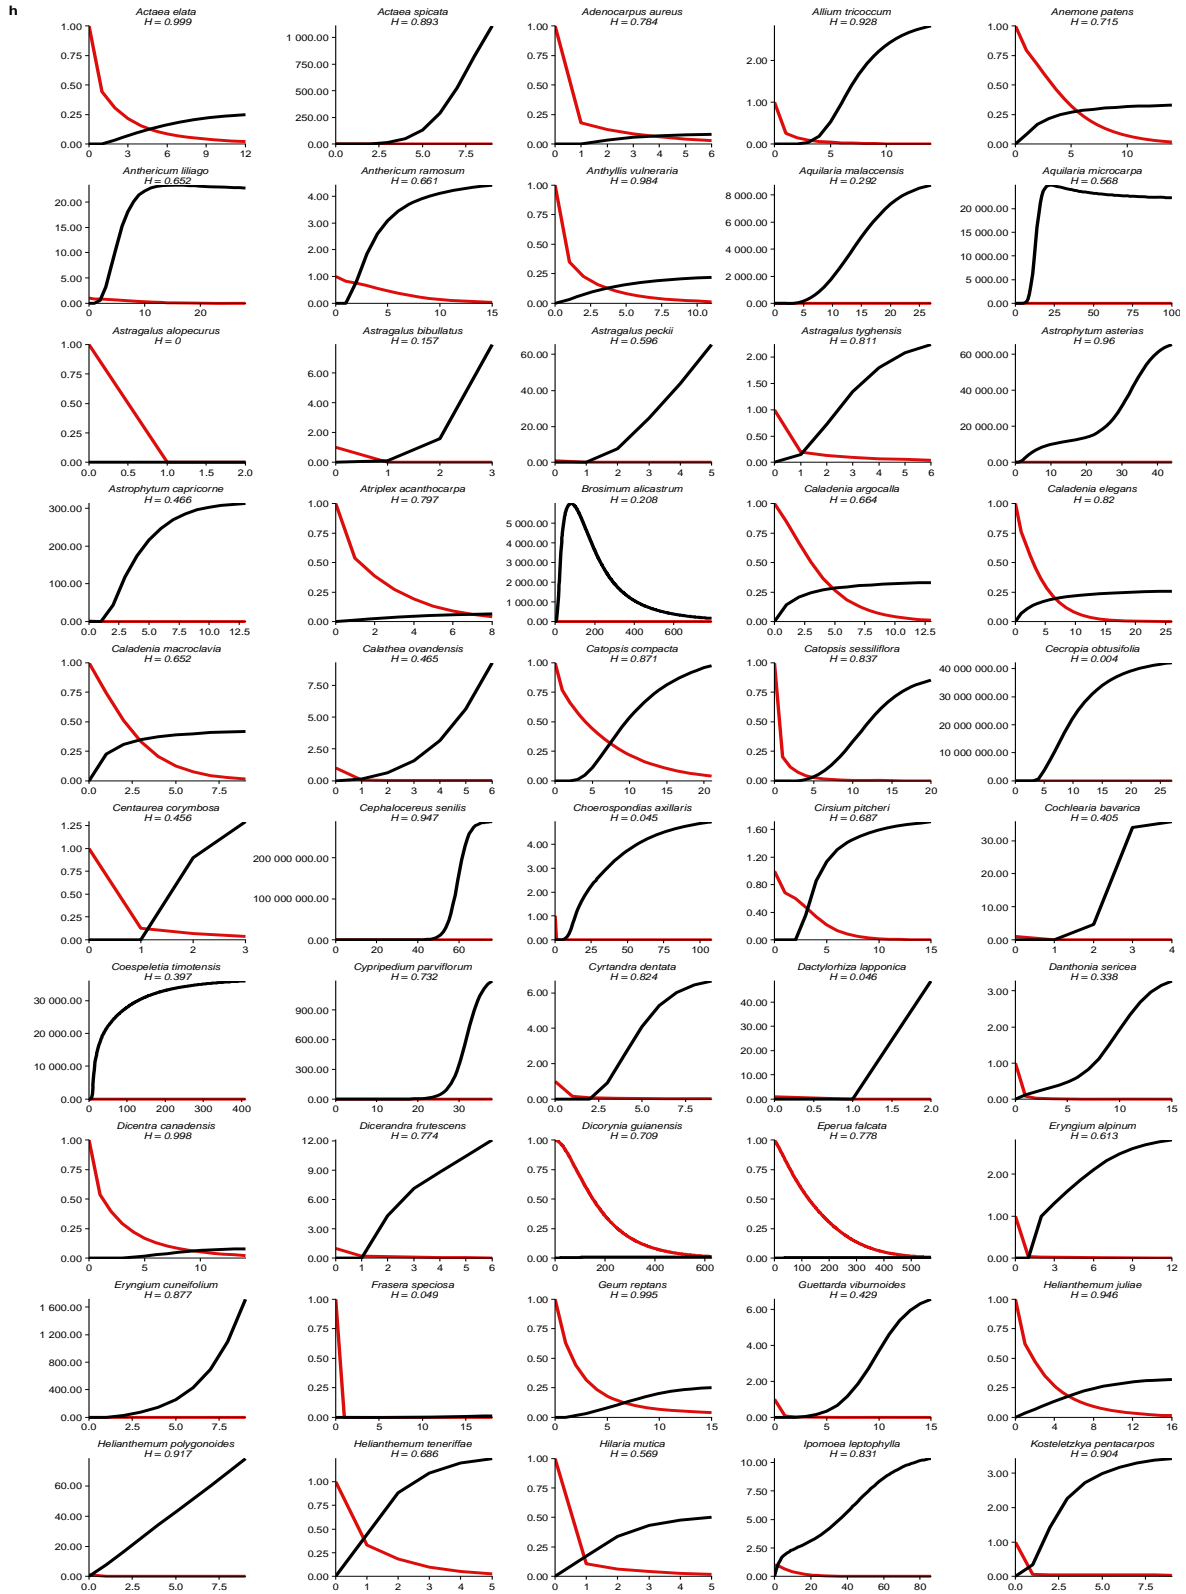

424

425

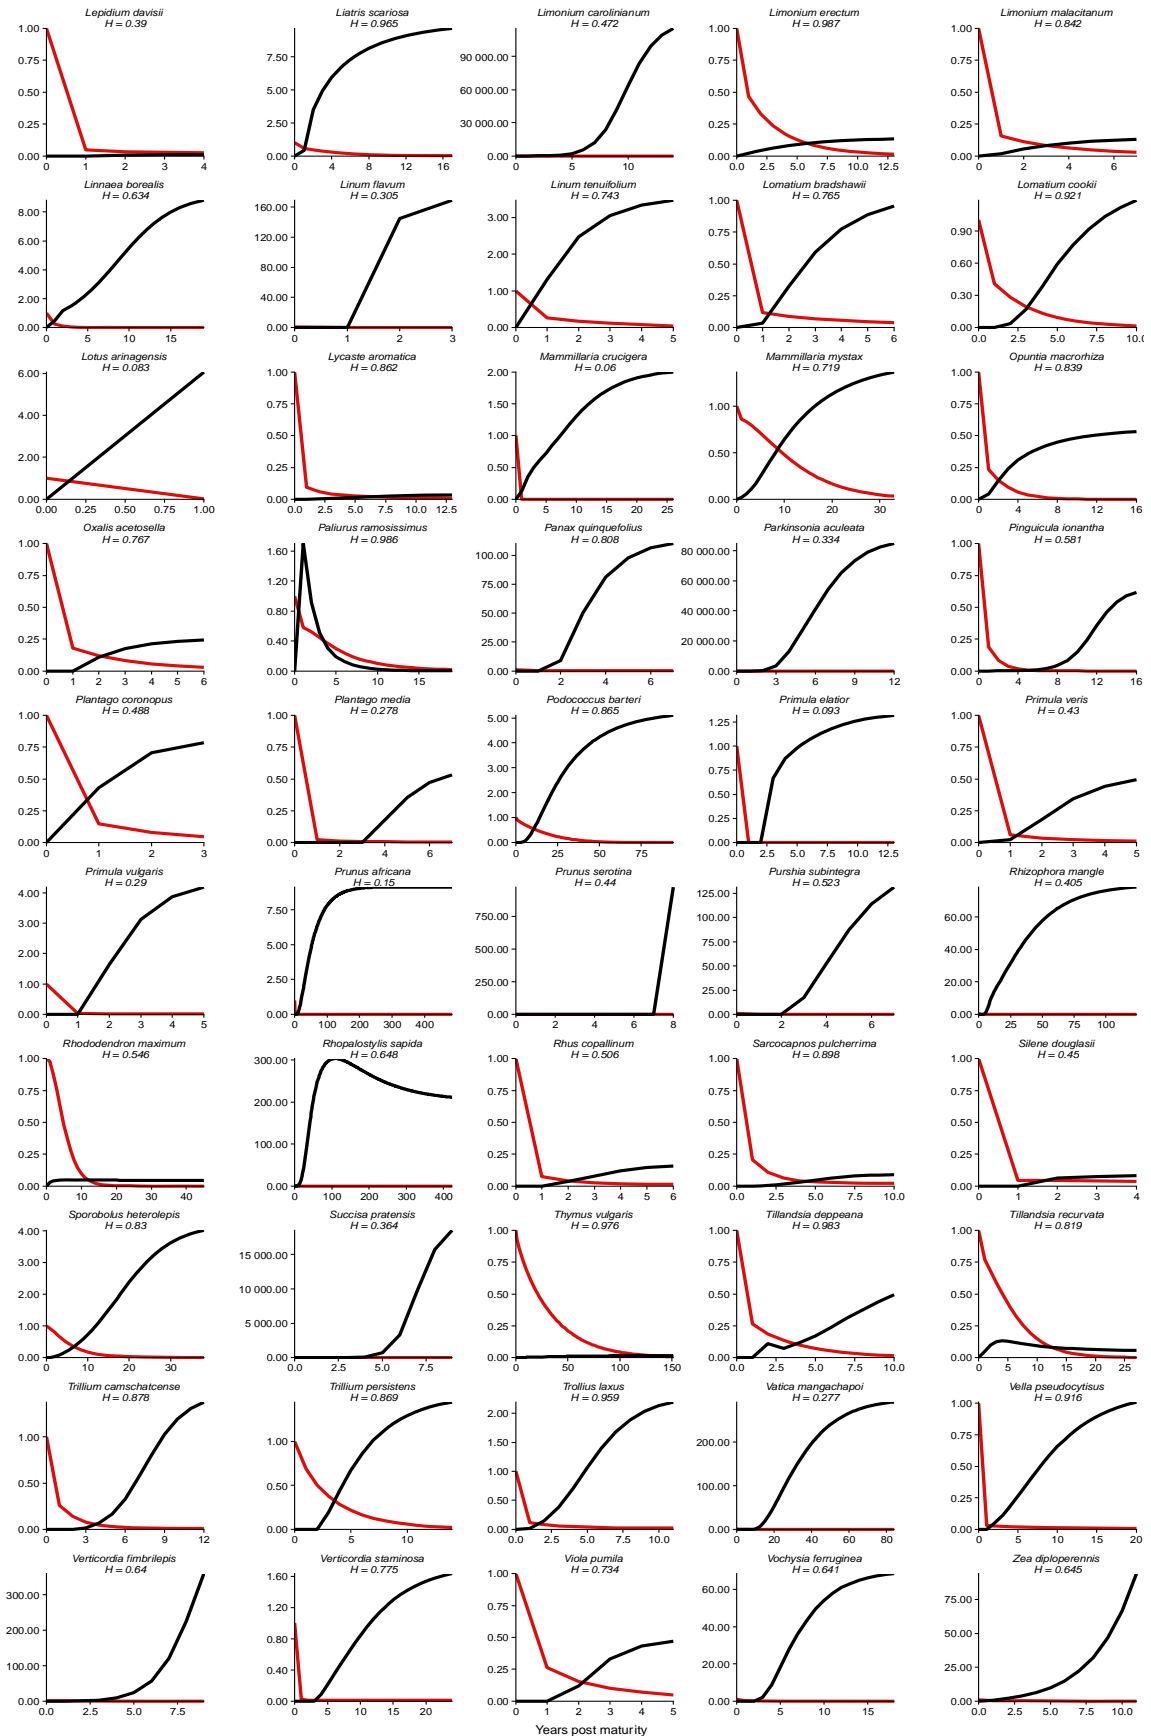

427 **Extended Data Table 1: Phylogenetic signals of actuarial senescence for each major**  
428 **taxonomic group of our 308 studied species are relatively weak.** Calculated estimates of  
429 Pagel's  $\lambda$  within the phylogenetic analysis of actuarial senescence across our study species.  
430 Pagel's  $\lambda$  is an index bounded between zero and one, where values  $\sim 0$  indicate that the  
431 evolutionary history of the species explains little about the variation of the trait measured,  
432 and values  $\sim 1$  suggest that that evolutionary history mostly explains the observed variation of  
433 the trait across the studied species.

434

| <b>Taxonomic breadth</b> | <b>Pagel's <math>\lambda</math></b> | <b>5% CI</b> | <b>95% CI</b> |
|--------------------------|-------------------------------------|--------------|---------------|
| Whole analysis           | 0.376                               | 0.142        | 0.654         |
| Plants                   | 0.359                               | 0.077        | 0.704         |
| Animals                  | 0.000                               | 0.000        | 0.572         |
| Angiosperms              | 0.215                               | 0.000        | 0.687         |
| Gymnosperms              | 0.000                               | 0.000        | 0.699         |
| Vertebrates              | 0.000                               | 0.000        | 0.658         |
| Invertebrates            | 0.291                               | 0.000        | 0.845         |

435

436 **Supplementary information**

437 **Supplementary Table 1: Study species.** Included species in our analysis were those that  
 438 fitted the selection criteria described in methods. Species names, their kingdom (Animalia or  
 439 Plantae), whether they display or escape actuarial senescence according to Keyfitz' entropy<sup>14</sup>  
 440 ( $H$ ), and the source study from which the data was originally compiled into COMADRE<sup>2</sup> and  
 441 COMPADRE<sup>3</sup> are listed.

| Species                       | Kingdom  | Actuarial senescence | $H$   | Source                                                                                                                                                                                                                                                                                                                            |
|-------------------------------|----------|----------------------|-------|-----------------------------------------------------------------------------------------------------------------------------------------------------------------------------------------------------------------------------------------------------------------------------------------------------------------------------------|
| <i>Clinocottus analis</i>     | Animalia | Displays senescence  | 0.945 | Davis, J., & Levin, L. Importance of pre-recruitment life-history stages to population dynamics of the woolly sculpin <i>Clinocottus analis</i> . <i>Marine Ecology Progress Series</i> . <b>234</b> , 229–246. (2002).                                                                                                           |
| <i>Cyprinodon diabolis</i>    | Animalia | Displays senescence  | 0.924 | Beissinger, S. R. Digging the pupfish out of its hole: risk analyses to guide harvest of Devils Hole pupfish for captive breeding. <i>PeerJ</i> . <b>2</b> , e549 (2014).                                                                                                                                                         |
| <i>Genypterus blacodes</i>    | Animalia | Displays senescence  | 0.472 | González-Olivares, E., Aránguiz-Acuña, A., Ramos-Jiliberto, R., & Rojas-Palma, A. Demographical analysis of the pink ling <i>Genypterus blacodes</i> (Schneider 1801) in the austral demersal fishery: A matrix approach evaluating harvest and non-harvest states. <i>Fisheries Research</i> , <b>96(2-3)</b> , 216–222. (2009). |
| <i>Poecilia reticulata</i>    | Animalia | Escapes senescence   | 1.069 | Bronikowski, A.M., Clark, M.E., Rodd, F.H. & Reznick, D.N. Population-dynamic consequences of predator-induced life history variation in the guppy ( <i>Poecilia reticulata</i> ). <i>Ecology</i> . <b>83(8)</b> , 2194-2204. (2002).                                                                                             |
| <i>Stellifer illecebrosus</i> | Animalia | Displays senescence  | 0.771 | Foster, S. J., & Vincent, A. C. J. Advice in spite of great uncertainty: assessing and addressing bycatch of small fishes with limited data using <i>Stellifer illecebrosus</i> as a case study. <i>Aquatic Conservation: Marine and Freshwater Ecosystems</i> , <b>22(5)</b> , 639–651. (2012).                                  |
| <i>Epidalea calamita</i>      | Animalia | Displays senescence  |       | Di Minin, E., & Griffiths, R. A. Viability analysis of a threatened amphibian population: modelling                                                                                                                                                                                                                               |

|                             |          |                     |       |                                                                                                                                                                                                                                                              |
|-----------------------------|----------|---------------------|-------|--------------------------------------------------------------------------------------------------------------------------------------------------------------------------------------------------------------------------------------------------------------|
|                             |          |                     | 0.352 | the past, present and future. <i>Ecography</i> , <b>34(1)</b> , 162–169. (2010).                                                                                                                                                                             |
| <i>Gorgonia ventalina</i>   | Animalia | Escapes senescence  | 1.121 | Sabat, A.M., & Toledo-Hernandez, C. Viability of Sea Fan Populations Impacted by Disease: Recruitment versus Incidence. <i>Journal of Marine Biology</i> . Vol 2015, Article ID 987060. (2015).                                                              |
| <i>Paramuricea clavata</i>  | Animalia | Escapes senescence  | 1.245 | Linares, C., & Doak, D. Forecasting the combined effects of disparate disturbances on the persistence of long-lived gorgonians: a case study of <i>Paramuricea clavata</i> . <i>Marine Ecology Progress Series</i> , <b>402</b> , 59–68. (2010).             |
| <i>Centrocercus minimus</i> | Animalia | Displays senescence | 0.408 | Davis, A. J., Hooten, M. B., Phillips, M. L., & Doherty, P. F. An integrated modeling approach to estimating Gunnison sage-grouse population dynamics: combining index and demographic data. <i>Ecology and Evolution</i> , <b>4(22)</b> , 4247-4257 (2014). |
| <i>Milvus migrans</i>       | Animalia | Escapes senescence  | 1.068 | Sergio, F., Tavecchia, G., Blas, J., López, L., Tanferna, A., & Hiraldo, F. Variation in age-structured vital rates of a long-lived raptor: Implications for population growth. <i>Basic and Applied Ecology</i> , <b>12(2)</b> , 107–115. (2011).           |
| <i>Picoides borealis</i>    | Animalia | Displays senescence | 0.785 | Maguire, L. A., Wilhere, G. F., & Dong, Q. Population Viability Analysis for Red-Cockaded Woodpeckers in the Georgia Piedmont. <i>The Journal of Wildlife Management</i> , <b>59(3)</b> , 533. (1995).                                                       |
| <i>Nuttallia obscurata</i>  | Animalia | Displays senescence | 0.886 | Dudas, S. E., Dower, J. F., & Anholt, B. R. Invasion dynamics of the varnish clam ( <i>Nuttallia obscurata</i> ): A matrix demographic modelling approach. <i>Ecology</i> , <b>88(8)</b> , 2084–2093. (2007).                                                |
| <i>Yoldia notabilis</i>     | Animalia | Displays senescence | 0.150 | Nakaoka, M. Demography of the Marine Bivalve <i>Yoldia notabilis</i> in Fluctuating Environments: An Analysis Using a Stochastic Matrix Model. <i>Oikos</i> , <b>79(1)</b> , 59.                                                                             |



|                              |          |                     |                                                                                                                                                                                                                                                                                                                    |
|------------------------------|----------|---------------------|--------------------------------------------------------------------------------------------------------------------------------------------------------------------------------------------------------------------------------------------------------------------------------------------------------------------|
|                              |          |                     | (1997).                                                                                                                                                                                                                                                                                                            |
| <i>Amphimedon compressa</i>  | Animalia | Displays senescence | 0.857 Mercado-Molina, A. E., Sabat, A. M., & Yoshioka, P. M. Demography of the demosponge <i>Amphimedon compressa</i> : Evaluation of the importance of sexual versus asexual recruitment to its population dynamics. <i>Journal of Experimental Marine Biology and Ecology</i> , <b>407(2)</b> , 355–362. (2011). |
| <i>Spongia graminea</i>      | Animalia | Escapes senescence  | 1.107 Cropper, W. P., & DiResta, D. Simulation of a Biscayne Bay, Florida commercial sponge population: effects of harvesting after Hurricane Andrew. <i>Ecological Modelling</i> , <b>118(1)</b> , 1–15. (1999).                                                                                                  |
| <i>Xestospongia muta</i>     | Animalia | Escapes senescence  | 1.031 Pawlik, J., McMurray, S., & Henkel, T. Abiotic factors control sponge ecology in Florida mangroves. <i>Marine Ecology Progress Series</i> , <b>339</b> , 93–98. (2007).                                                                                                                                      |
| <i>Isurus oxyrinchus</i>     | Animalia | Escapes senescence  | 1.072 Tsai, W.-P., Sun, C.-L., Punt, A. E., & Liu, K.-M. Demographic analysis of the shortfin mako shark, <i>Isurus oxyrinchus</i> , in the Northwest Pacific using a two-sex stage-based matrix model. <i>ICES Journal of Marine Science</i> , <b>71(7)</b> , 1604–1618. (2014).                                  |
| <i>Haliotis rufescens</i>    | Animalia | Displays senescence | 0.738 Rogers-Bennett, L., & Leaf, R. T. Elasticity Analyses of Size-Based Red And White Abalone Matrix Models: Management And Conservation. <i>Ecological Applications</i> , <b>16(1)</b> , 213–224. (2006).                                                                                                       |
| <i>Lepetodrilus fucensis</i> | Animalia | Escapes senescence  | 1.051 Kelly, N., & Metaxas, A. Understanding population dynamics of a numerically dominant species at hydrothermal vents: a matrix modeling approach. <i>Marine Ecology Progress Series</i> , <b>403</b> , 113–128. (2010).                                                                                        |
| <i>Scolytus ventralis</i>    | Animalia | Displays senescence | Berryman, A. A. (1973). Population dynamics of the fir engraver, <i>Scolytus ventralis</i> (Coleoptera: Scolytidae). I. Analysis of population behaviour and survival from 1964 to                                                                                                                                 |

|                               |          |                     |       |                                                                                                                                                                                                                                                                  |
|-------------------------------|----------|---------------------|-------|------------------------------------------------------------------------------------------------------------------------------------------------------------------------------------------------------------------------------------------------------------------|
|                               |          |                     | 0.438 | 1971. <i>The Canadian Entomologist</i> , <b>105(11)</b> , 1465–1488. (1973)                                                                                                                                                                                      |
| <i>Cardisoma guanhumii</i>    | Animalia | Displays senescence | 0.000 | Rodriguez-Fourquet, PhD thesis, 2004.                                                                                                                                                                                                                            |
| <i>Pagurus longicarpus</i>    | Animalia | Displays senescence | 0.685 | Damiani, C. C. (2005). Integrating direct effects and trait-mediated indirect effects using a projection matrix model. <i>Ecology</i> , <b>86(8)</b> , 2068–2074. (2005).                                                                                        |
| <i>Canis lupus familiaris</i> | Animalia | Escapes senescence  | 1.140 | Makenov, M. T., & Bekova, S. K. Demography of domestic dog population and its implications for stray dog abundance: a case study of Omsk, Russia. <i>Urban Ecosystems</i> , <b>19(3)</b> , 1405–1418. (2016).                                                    |
| <i>Lepus europaeus</i>        | Animalia | Displays senescence | 0.116 | Marboutin, E., & Peroux, R. Survival Pattern of European Hare in a Decreasing Population. <i>The Journal of Applied Ecology</i> , <b>32(4)</b> , 809. (1995).                                                                                                    |
| <i>Marmota flaviventris</i>   | Animalia | Displays senescence | 0.813 | Ozgul, A., Oli, M. K., Armitage, K. B., Blumstein, D. T., & Van Vuren, D. H. Influence of Local Demography on Asymptotic and Transient Dynamics of a Yellow-Bellied Marmot Metapopulation. <i>Am. Nat.</i> <b>173(4)</b> , 517–530. (2009).                      |
| <i>Odocoileus virginianus</i> | Animalia | Displays senescence | 0.292 | Chitwood, M. C., Lashley, M. A., Kilgo, J. C., Moorman, C. E., & Deperno, C. S. White-tailed deer population dynamics and adult female survival in the presence of a novel predator. <i>The Journal of Wildlife Management</i> , <b>79(2)</b> , 211–219. (2015). |
| <i>Orcinus orca</i>           | Animalia | Displays senescence | 0.998 | Velez-Espino, L.A. et al. Comparative demography and viability of northeastern Pacific resident killer whale populations at risk. <i>Can Tech Report Fish &amp; Aq Sci.</i> (2014).                                                                              |
| <i>Ovis aries</i>             | Animalia | Displays senescence | 0.208 | Clutton-Brock, T. H., Price, O. F., Albon, S. D., & Jewell, P. A. Early Development and Population Fluctuations in Soay Sheep. <i>The Journal of Animal Ecology</i> , <b>61(2)</b> , 381. (1992).                                                                |
| <i>Phocarctos hookeri</i>     | Animalia | Escapes senescence  |       | Meyer, S., Robertson, B. C., Chilvers, B. L., & Krkošek, M. Population dynamics reveal conservation priorities of the threatened New Zealand sea lion                                                                                                            |

|                               |          |                     |       |                                                                                                                                                                                                                                 |
|-------------------------------|----------|---------------------|-------|---------------------------------------------------------------------------------------------------------------------------------------------------------------------------------------------------------------------------------|
|                               |          |                     | 1.448 | <i>Phocarcos hookeri</i> . <i>Marine Biology</i> , <b>162(8)</b> , 1587–1596. (2015).                                                                                                                                           |
| <i>Ursus americanus</i>       | Animalia | Displays senescence | 0.823 | Lewis, D. L., Breck, S. W., Wilson, K. R., & Webb, C. T. Modeling black bear population dynamics in a human-dominated stochastic environment. <i>Ecological Modelling</i> , <b>294</b> , 51–58. (2014).                         |
| <i>Zalophus californianus</i> | Animalia | Displays senescence | 0.612 | Wielgus, J., Gonzalez-Suarez, M., Auriolos-Gamboa, D., & Gerber, L. R. A noninvasive demographic assessment of sea lions base don stage-specific abundances. <i>Ecological Applications</i> , <b>18(5)</b> , 1287–1296. (2008). |
| <i>Arctodiaptomus salinus</i> | Animalia | Displays senescence | 0.708 | Jiménez-Melero, R., Gilbert, J., & Guerrero, F. Secondary production of <i>Arctodiaptomus salinus</i> in a shallow saline pond: comparison of methods. <i>Marine Ecology Progress Series</i> , <b>483</b> , 103–116. (2013).    |
| <i>Chelodina expansa</i>      | Animalia | Escapes senescence  | 1.501 | Spencer, R.J., & Thompson, M.B. Experimental Analysis of the Impact of Foxes on Freshwater Turtle Populations. <i>Conservation Biology</i> , <b>19(3)</b> , 845–854. (2005).                                                    |
| <i>Chrysemys picta</i>        | Animalia | Displays senescence | 0.915 | Mitchell, J. C. Population Ecology and Life Histories of the Freshwater Turtles <i>Chrysemys picta</i> and <i>Sternotherus odoratus</i> in an Urban Lake. <i>Herpetological Monographs</i> , <b>2</b> , 40. (1988).             |
| <i>Crocodylus johnsoni</i>    | Animalia | Escapes senescence  | 1.802 | Tucker, PhD Thesis, 1997.<br>Smith, A.M.A & Webb, G.J.W. <i>Crocodylus johnsoni</i> in the McKinlay Area, N.T. VIII. A Population Simulation Model: <i>Wildlife Research</i> <b>12</b> , 541-554. (1985)                        |
| <i>Crocodylus niloticus</i>   | Animalia | Escapes senescence  | 1.005 | Hutton, PhD thesis, 1984.                                                                                                                                                                                                       |
| <i>Emydura macquarii</i>      | Animalia | Displays senescence | 0.480 | SPENCER, R.-J., & THOMPSON, M. B. (2005). Experimental Analysis of the Impact of Foxes on Freshwater Turtle Populations. <i>Conservation Biology</i> , <b>19(3)</b> , 845–854. (2005).                                          |
| <i>Kinosternon</i>            | Animalia | Displays senescence |       | Macip-Rios, R. et al.                                                                                                                                                                                                           |

|                              |          |                     |       |                                                                                                                                                                                                                                                                                                                                    |
|------------------------------|----------|---------------------|-------|------------------------------------------------------------------------------------------------------------------------------------------------------------------------------------------------------------------------------------------------------------------------------------------------------------------------------------|
| <i>integrum</i>              |          |                     | 0.681 | Demography of two populations of the Mexican mud turtle ( <i>Kinosternon integrum</i> ) in central Mexico. <i>Herp J.</i> <b>21(4)</b> , 235-245. (2011).                                                                                                                                                                          |
| <i>Malaclemys terrapin</i>   | Animalia | Displays senescence | 0.828 | Crawford, B. A., Maerz, J. C., Nibbelink, N. P., Buhlmann, K. A., & Norton, T. M. Estimating the consequences of multiple threats and management strategies for semi-aquatic turtles. <i>Journal of Applied Ecology</i> , <i>51(2)</i> , 359–366. (2014).                                                                          |
| <i>Podocnemis lewyana</i>    | Animalia | Displays senescence | 0.381 | Páez, V. P., Bock, B. C., Espinal-García, P. A., Rendón-Valencia, B. H., Alzate-Estrada, D., Cartagena-Otálvaro, V. M., & Heppell, S. S. Life History and Demographic Characteristics of the Magdalena River Turtle ( <i>Podocnemis lewyana</i> ): Implications for Management. <i>Copeia</i> , <b>103(4)</b> , 1058–1074. (2015). |
| <i>Podocnemis expansa</i>    | Animalia | Displays senescence | 0.640 | Mogollones, S. C., Rodríguez, D. J., Hernández, O., & Barreto, G. R. A Demographic Study of the Arrau Turtle ( <i>Podocnemis expansa</i> ) in the Middle Orinoco River, Venezuela. <i>Chelonian Conservation and Biology</i> , <b>9(1)</b> , 79–89. (2010).                                                                        |
| <i>Sceloporus grammicus</i>  | Animalia | Displays senescence | 0.688 | Pérez-Mendoza, H. A., Zúñiga-Vega, J. J., Zurita-Gutiérrez, Y. H., Fornoni, J., Solano-Zavaleta, I., Hernández-Rosas, A. L., & Molina-Moctezuma, A. Demographic Importance of the Life-Cycle Components in <i>Sceloporus grammicus</i> . <i>Herpetologica</i> , <b>69(4)</b> , 411–435. (2013).                                    |
| <i>Sceloporus mucronatus</i> | Animalia | Displays senescence | 0.871 | Ortega-Leon, A.M., Smith, E.R., Zúñiga-Vega, J. J & Mendez-de la Cruz, F.R. Growth and demography of one population of the lizard <i>Sceloporus mucronatus</i> . <i>West N Am Naturalist</i> . <b>67(4)</b> , 492-502. (2007).                                                                                                     |
| <i>Xenosaurus grandis</i>    | Animalia | Displays senescence |       | Zúñiga-Vega, J. J., Valverde, T., Rojas-Gonzalez, R.I. & Lemos-Espinal, J.A. Analysis of the population dynamics of an                                                                                                                                                                                                             |

|                                |          |                     |       |                                                                                                                                                                                                                                                                                                                               |
|--------------------------------|----------|---------------------|-------|-------------------------------------------------------------------------------------------------------------------------------------------------------------------------------------------------------------------------------------------------------------------------------------------------------------------------------|
|                                |          |                     | 0.691 | endangered lizard ( <i>Xenosaurus grandis</i> ) through the use of projection matrices. <i>Copeia</i> . 2, 324-335. (2007).                                                                                                                                                                                                   |
| <i>Xenosaurus platyceps</i>    | Animalia | Escapes senescence  | 1.242 | Jones, C., Rojas-González, I., Lemos-Espinal, J., & Zúñiga-Vega, J. Demography of <i>Xenosaurus platyceps</i> (Squamata: Xenosauridae): a comparison between tropical and temperate populations. <i>Amphibia-Reptilia</i> , <b>29(2)</b> , 245–256. (2008).                                                                   |
|                                |          |                     | 0.051 | Pinya, S., Tavecchia, G. & Perez-Mellado, V. Population model of an endangered amphibian: implications for conservation management. <i>Endangered Species Research</i> . <b>34</b> , 123-130. (2017).                                                                                                                         |
| <i>Alytes muletensis</i>       | Animalia | Displays senescence | 1.004 | Lima, M. & Paez, E. Demography and Population Dynamics of South American Fur Seals. <i>Journal of Mammalogy</i> . <b>78(3)</b> , 914-920. (1997).                                                                                                                                                                             |
| <i>Arctocephalus australis</i> | Animalia | Escapes senescence  | 0.751 | Oli, M.K. <i>et al.</i> Dynamics of leprosy in nine-banded armadillos: Net reproductive number and effects on host population dynamics. <i>Ecological Modelling</i> . <b>350</b> , 100-108. (2017).                                                                                                                           |
| <i>Dasybus novemcinctus</i>    | Animalia | Displays senescence |       | Zotz, G., & Schmidt, G. Population decline in the epiphytic orchid <i>Aspasia principissa</i> . <i>Biological Conservation</i> , <b>129(1)</b> , 82–90. (2006).                                                                                                                                                               |
| <i>Aspasia principissa</i>     | Plantae  | Escapes senescence  | 1.163 |                                                                                                                                                                                                                                                                                                                               |
|                                |          |                     | 0.871 | Del Castillo, R. F., Trujillo-Argueta, S., Rivera-García, R., Gómez-Ocampo, Z., & Mondragón-Chaparro, D. Possible combined effects of climate change, deforestation, and harvesting on the epiphyte <i>Catopsis compacta</i> : a multidisciplinary approach. <i>Ecology and Evolution</i> , <b>3(11)</b> , 3935–3946. (2013). |
| <i>Catopsis compacta</i>       | Plantae  | Displays senescence |       |                                                                                                                                                                                                                                                                                                                               |
|                                |          |                     | 0.837 | Winkler, M., Hülber, K., & Hietz, P. Population dynamics of epiphytic bromeliads: Life strategies and the role of host branches. <i>Basic and Applied Ecology</i> , <b>8(2)</b> , 183–196. (2007).                                                                                                                            |
| <i>Catopsis sessiliflora</i>   | Plantae  | Displays senescence |       |                                                                                                                                                                                                                                                                                                                               |
| <i>Jacquinilla teretifolia</i> | Plantae  | Escapes senescence  |       | Winkler, M., Hülber, K., & Hietz, P. Population dynamics of                                                                                                                                                                                                                                                                   |

|                                |         |                     |       |                                                                                                                                                                                                                                |
|--------------------------------|---------|---------------------|-------|--------------------------------------------------------------------------------------------------------------------------------------------------------------------------------------------------------------------------------|
|                                |         |                     | 1.067 | epiphytic orchids in a metapopulation context. <i>Annals of Botany</i> , <b>104(5)</b> , 995–1004. (2009).                                                                                                                     |
| <i>Lepanthes eltoroensis</i>   | Plantae | Escapes senescence  | 2.247 | Tremblay, R.L. & Ackerman, J.D. Gene flow and effective population size in <i>Lepanthes</i> ( <i>Orchidaceae</i> ): a case for genetic drift. <i>Biological Journal of the Linnean Society</i> , <b>72(1)</b> , 47–62. (2001). |
| <i>Lepanthes rubripetala</i>   | Plantae | Escapes senescence  | 1.786 | Schödelbauerová I, Tremblay, R. L., & Kindlmann, P. Prediction vs. reality: Can a PVA model predict population persistence 13 years later? <i>Biodiversity and Conservation</i> . <b>19(3)</b> , 637-650. (2009).              |
| <i>Lycaste aromatica</i>       | Plantae | Displays senescence | 0.862 | Winkler, M., Hülber, K., & Hietz, P. Population dynamics of epiphytic orchids in a metapopulation context. <i>Annals of Botany</i> , <b>104(5)</b> , 995–1004. (2009).                                                         |
| <i>Tillandsia depeana</i>      | Plantae | Displays senescence | 0.983 | Winkler, M., Hülber, K., & Hietz, P. Population dynamics of epiphytic bromeliads: Life strategies and the role of host branches. <i>Basic and Applied Ecology</i> , <b>8(2)</b> , 183–196. (2007).                             |
| <i>Tillandsia juncea</i>       | Plantae | Escapes senescence  | 1.142 | Winkler, M., Hülber, K., & Hietz, P. Population dynamics of epiphytic bromeliads: Life strategies and the role of host branches. <i>Basic and Applied Ecology</i> , <b>8(2)</b> , 183–196. (2007).                             |
| <i>Tillandsia macdougallii</i> | Plantae | Escapes senescence  | 1.500 | Mondragon Chopparo D., & Ticktin, T. Demographic Effects of Harvesting Epiphytic Bromeliads and an Alternative Approach to Collection. <i>Conservation Biology</i> , <b>25(4)</b> , 797–807. (2011).                           |
| <i>Tillandsia multicaulis</i>  | Plantae | Escapes senescence  | 1.154 | Winkler, M., Hülber, K., & Hietz, P. Population dynamics of epiphytic bromeliads: Life strategies and the role of host branches. <i>Basic and Applied Ecology</i> , <b>8(2)</b> , 183–196. (2007).                             |
| <i>Tillandsia punctulata</i>   | Plantae | Escapes senescence  |       | Toledo-Aceves, T., Hernández-Apolinar, M., & Valverde, T. Potential impact of harvesting on                                                                                                                                    |

|                                      |         |                     |       |                                                                                                                                                                                                                  |
|--------------------------------------|---------|---------------------|-------|------------------------------------------------------------------------------------------------------------------------------------------------------------------------------------------------------------------|
|                                      |         |                     | 1.259 | the population dynamics of two epiphytic bromeliads. <i>Acta Oecologica</i> , <b>59</b> , 52–61. (2014).                                                                                                         |
| <i>Tillandsia recurvata</i>          | Plantae | Displays senescence | 0.819 | Valverde, T. & Rocio, B. Is there demographic asynchrony among local populations of <i>Tillandsia recurvata</i> ? Evidence of its metapopulation functioning. <i>Bol. Soc. Bot. Mex.</i> <b>n.86</b> (2010).     |
| <i>Vriesea sanguinolenta</i>         | Plantae | Escapes senescence  | 1.042 | Zotz, G. Differences in vital demographic rates in three populations of the epiphytic bromeliad, <i>Werauhia sanguinolenta</i> . <i>Acta Oecologica</i> , <b>28(3)</b> , 306–312. (2005).                        |
| <i>Actaea spicata</i>                | Plantae | Displays senescence | 0.893 | Fröborg, H., & Eriksson, O. Predispersal seed predation and population dynamics in the perennial understorey herb <i>Actaea spicata</i> . <i>Canadian Journal of Botany</i> , <b>81(11)</b> , 1058–1069. (2003). |
| <i>Adenocarpus aureus gibbsianus</i> | Plantae | Displays senescence | 0.784 | Iriondo; Albert; Giménez; Lozano; Escudero (2009). Book.                                                                                                                                                         |
| <i>Allium tricoccum</i>              | Plantae | Displays senescence | 0.928 | Nault, A., & Gagnon, D. Ramet Demography of <i>Allium tricoccum</i> , A Spring Ephemeral, Perennial Forest Herb. <i>The Journal of Ecology</i> , <b>81(1)</b> , 101. (1993).                                     |
| <i>Anemone patens</i>                | Plantae | Displays senescence | 0.715 | Williams, J.L. & Crone, E.E. The impact of invasive grasses on the population growth of <i>Anemone patens</i> , a long-lived native forb. <i>Ecology</i> . <b>87 (12)</b> 3200-3208 (2006).                      |
| <i>Anthericum liliago</i>            | Plantae | Displays senescence | 0.652 | Cerná, L., & Münzbergová, Z. (2013). Comparative Population Dynamics of Two Closely Related Species Differing in Ploidy Level. <i>PLoS ONE</i> . <b>8(10)</b> , e75563. (2013).                                  |
| <i>Anthericum ramosum</i>            | Plantae | Displays senescence | 0.661 | Cerná, L., & Münzbergová, Z. Comparative Population Dynamics of Two Closely Related Species Differing in Ploidy Level. <i>PLoS ONE</i> . <b>8(10)</b> , e75563. (2013).                                          |
| <i>Anthyllis vulneraria alpicola</i> | Plantae | Displays senescence |       | Marcante, S., Winkler, E., & Erschbamer, B. Population dynamics along a primary                                                                                                                                  |

|                                |         |                     |       |                                                                                                                                                                                                                                             |
|--------------------------------|---------|---------------------|-------|---------------------------------------------------------------------------------------------------------------------------------------------------------------------------------------------------------------------------------------------|
|                                |         |                     | 0.984 | succession gradient: do alpine species fit into demographic succession theory? <i>Annals of Botany</i> . <b>103(7)</b> , 1129–1143. (2009).                                                                                                 |
| <i>Antirrhinum subbaeticum</i> | Plantae | Escapes senescence  | 1.003 | Iriondo; Albert; Gimenez; Lozana; Escuerdo. 978-84-8014-746-0                                                                                                                                                                               |
| <i>Boechera fecunda</i>        | Plantae | Escapes senescence  | 1.009 | Lesica, P., & Shelly, J. S. Effects of reproductive mode on demography and life history in <i>Arabis fecunda</i> (Brassicaceae). <i>American Journal of Botany</i> . <b>82(6)</b> , 752–762. (1995).                                        |
| <i>Arisaema serratum</i>       | Plantae | Escapes senescence  | 1.034 | Kinoshita, E. Sex Change and Population Dynamics in <i>Arisaema serratum</i> . <i>Plant Species Biology</i> . <b>2(1-2)</b> , 15–28. (1987).                                                                                                |
| <i>Armeria maritima</i>        | Plantae | Escapes senescence  | 1.310 | Lefebvre, C., & Chandler-Mortimer, A. Demographic Characteristics of the Perennial Herb <i>Armeria maritima</i> on Zilc Lead Mine Wastes. <i>The Journal of Applied Ecology</i> . <b>21(1)</b> , 255. (1984).                               |
| <i>Artemisia genipi</i>        | Plantae | Escapes senescence  | 1.108 | Marcante, S., Winkler, E., & Erschbamer, B. Population dynamics along a primary succession gradient: do alpine species fit into demographic succession theory? <i>Annals of Botany</i> . <b>103(7)</b> , 1129–1143. (2009).                 |
| <i>Astragalus alopecurus</i>   | Plantae | Displays senescence | 0.000 | Nicole, PhD thesis, 2005                                                                                                                                                                                                                    |
| <i>Astragalus peckii</i>       | Plantae | Displays senescence | 0.596 | Martin, E. F., & Meinke, R. J. Variation in the demographics of a rare central Oregon endemic, <i>Astragalus peckii</i> Piper (Fabaceae), with fluctuating levels of herbivory. <i>Population Ecology</i> . <b>54(3)</b> , 381–390. (2012). |
| <i>Astragalus tyghensis</i>    | Plantae | Displays senescence | 0.811 | Kaye, T.N. & Pyke, D.A. The effect of stochastic technique on estimates of population viability from transition matrix models. <i>Ecology</i> . <b>84(6)</b> , 1464-1476. (2003).                                                           |
| <i>Calathea ovandensis</i>     | Plantae | Displays senescence |       | Horvitz, C. C., & Schemske, D. W. Spatiotemporal Variation in Demographic Transitions of a Tropical Understory Herb: Projection Matrix Analysis.                                                                                            |



|                                 |         |                     |       |                                                                                                                                                                                                                                                                                                      |
|---------------------------------|---------|---------------------|-------|------------------------------------------------------------------------------------------------------------------------------------------------------------------------------------------------------------------------------------------------------------------------------------------------------|
|                                 |         |                     | 0.465 | <i>Ecological Monographs</i> . <b>65(2)</b> , 155–192. (1995).                                                                                                                                                                                                                                       |
| <i>Calochortus albus</i>        | Plantae | Escapes senescence  | 1.313 | Fiedler, P. L. Life History and Population Dynamics of Rare and Common Mariposa Lilies ( <i>Calochortus Pursh</i> : Liliaceae). <i>The Journal of Ecology</i> . <b>75(4)</b> , 977. (1987).                                                                                                          |
| <i>Calochortus lyallii</i>      | Plantae | Escapes senescence  | 1.186 | Allen, PhD thesis, 2004.                                                                                                                                                                                                                                                                             |
| <i>Calochortus pulchellus</i>   | Plantae | Escapes senescence  | 1.141 | Fiedler, P. L. Life History and Population Dynamics of Rare and Common Mariposa Lilies ( <i>Calochortus Pursh</i> : Liliaceae). <i>The Journal of Ecology</i> . <b>75(4)</b> , 977. (1987).                                                                                                          |
| <i>Chamaelirium luteum</i>      | Plantae | Escapes senescence  | 1.185 | Meagher, T. R., & Antonovics, J. The Population Biology of <i>Chamaelirium Luteum</i> , A Dioecious Member of the Lily Family: Life History Studies. <i>Ecology</i> . <b>63(6)</b> , 1690. (1982).                                                                                                   |
| <i>Actaea elata</i>             | Plantae | Displays senescence | 0.999 | Kaye, T.N. & Pyke, D.A. The effect of stochastic technique on estimates of population viability from transition matrix models. <i>Ecology</i> . <b>84(6)</b> 1464-1476. (2003).                                                                                                                      |
| <i>Cochlearia bavarica</i>      | Plantae | Displays senescence | 0.405 | Abs, C. Differences in the life histories of two Cochlearia species. <i>Folia Geobotanica</i> , <b>34(1)</b> , 33–45. (1999).                                                                                                                                                                        |
| <i>Colchicum autumnale</i>      | Plantae | Escapes senescence  | 1.063 | Winter, S., Jung, L. S., Eckstein, R. L., Otte, A., Donath, T. W., & Kriechbaum, M. Control of the toxic plant <i>Colchicum autumnale</i> in semi-natural grasslands: effects of cutting treatments on demography and diversity. <i>Journal of Applied Ecology</i> . <b>51(2)</b> , 524–533. (2014). |
| <i>Corallorhiza trifida</i>     | Plantae | Escapes senescence  | 1.056 | Iriondo; Albert; Gimenez; Lozana; Escuerdo 978-84-8014-746-0                                                                                                                                                                                                                                         |
| <i>Cypripedium calceolus</i>    | Plantae | Escapes senescence  | 1.932 | Nicole, F., Brzosko, E., & Till-Bottraud, I. Population viability analysis of <i>Cypripedium calceolus</i> in a protected area: longevity, stability and persistence. <i>Journal of Ecology</i> . <b>93(4)</b> , 716–726. (2005).                                                                    |
| <i>Cypripedium fasciculatum</i> | Plantae | Escapes senescence  |       | Crone, E.E. <i>et al.</i> Ability of Matrix Models to Explain the Past and Predict the Future of Plant                                                                                                                                                                                               |

|                                 |         |                     |       |                                                                                                                                                                                                                                                                    |
|---------------------------------|---------|---------------------|-------|--------------------------------------------------------------------------------------------------------------------------------------------------------------------------------------------------------------------------------------------------------------------|
|                                 |         |                     | 1.093 | Populations. <i>Conservation Biology</i> . <b>27(5)</b> , 968-978. (2013).                                                                                                                                                                                         |
| <i>Cypripedium parviflorum</i>  | Plantae | Displays senescence | 0.732 | Shefferson, R.P., Warren, R.J. & Pulliam, H.R. Life-history costs make perfect sprouting maladaptive in two herbaceous perennials. <i>Journal of Ecology</i> . <b>102(5)</b> , 1318-1328. (2014).                                                                  |
| <i>Dactylorhiza lapponica</i>   | Plantae | Displays senescence | 10.46 | Sletvold, N., Øien, D.-I., & Moen, A. Long-term influence of mowing on population dynamics in the rare orchid <i>Dactylorhiza lapponica</i> : The importance of recruitment and seed production. <i>Biological Conservation</i> . <b>143(3)</b> , 747-755. (2010). |
| <i>Danthonia sericea</i>        | Plantae | Displays senescence | 0.338 | Moloney, K. A. Fine-Scale Spatial and Temporal Variation in the Demography of a Perennial Bunchgrass. <i>Ecology</i> . <b>69(5)</b> , 1588-1598. (1988).                                                                                                           |
| <i>Dicentra canadensis</i>      | Plantae | Displays senescence | 0.998 | Lin, C.-H., Miriti, M. N., & Goodell, K. (Demographic consequences of greater clonal than sexual reproduction in <i>Dicentra canadensis</i> . <i>Ecology and Evolution</i> . <b>6(12)</b> , 3871-3883. (2016).                                                     |
| <i>Dicerandra frutescens</i>    | Plantae | Displays senescence | 0.774 | Menges, E. S., Quintana Ascencio, P. F., Weekley, C. W., & Gaoue, O. G. Population viability analysis and fire return intervals for an endemic Florida scrub mint. <i>Biological Conservation</i> . <b>127(1)</b> , 115-127. (2006).                               |
| <i>Dracocephalum austriacum</i> | Plantae | Escapes senescence  | 1.146 | Andrello, PhD thesis, 2010.                                                                                                                                                                                                                                        |
| <i>Eryngium alpinum</i>         | Plantae | Escapes senescence  | 0.613 | Andrello, M. <i>et al.</i> Effects of management regimes and extreme climatic events on plant population viability in <i>Eryngium alpinum</i> . <i>Biological Conservation</i> . <b>147(1)</b> , 99-106. (2012).                                                   |
| <i>Eryngium cuneifolium</i>     | Plantae | Displays senescence | 0.877 | Menges, E. S., & Quintana-Ascencio, P. F. Population viability with fire in <i>Eryngium cuneifolium</i> : deciphering a decade of demographic data. <i>Ecological Monographs</i> . <b>74(1)</b> , 79-99. (2004).                                                   |
| <i>Geranium sylvaticum</i>      | Plantae | Escapes senescence  |       | Ramula, S., Toivonen, E., & Mutikainen, P. Demographic                                                                                                                                                                                                             |

|                                  |         |                     |       |                                                                                                                                                                                                                                         |
|----------------------------------|---------|---------------------|-------|-----------------------------------------------------------------------------------------------------------------------------------------------------------------------------------------------------------------------------------------|
|                                  |         |                     | 1.097 | Consequences of Pollen Limitation and Inbreeding Depression in a Gynodioecious Herb. <i>International Journal of Plant Sciences</i> . <b>168(4)</b> , 443–453. (2007).                                                                  |
| <i>Geum reptans</i>              | Plantae | Displays senescence | 0.995 | Weppler, T., Stoll, P., & Stocklin, J. The relative importance of sexual and clonal reproduction for population growth in the long-lived alpine plant <i>Geum reptans</i> . <i>Journal of Ecology</i> . <b>94(4)</b> , 869–879. (2006). |
| <i>Helianthemum polygonoides</i> | Plantae | Displays senescence | 0.917 | Iriondo; Albert; Gimenez; Lozana; Escuerdo 978-84-8014-746-0                                                                                                                                                                            |
| <i>Helianthemum teneriffae</i>   | Plantae | Displays senescence | 0.686 | Iriondo; Albert; Gimenez; Lozana; Escuerdo 978-84-8014-746-0                                                                                                                                                                            |
| <i>Hilaria mutica</i>            | Plantae | Displays senescence | 0.569 | Vega, E., & Montaña, C. Spatio-temporal variation in the demography of a bunch grass in a patchy semiarid environment. <i>Plant Ecology Formerly 'Vegetatio'</i> . <b>175(1)</b> , 107–120. (2004).                                     |
| <i>Hyparrhenia diplandra</i>     | Plantae | Escapes senescence  | 2.502 | Garnier, L.K.M. & Dajoz, I. Evolutionary significance of awn length variation in a clonal grass of fire-prone savannas. <i>Ecology</i> . <b>82(6)</b> , 1720-1733. (2001).                                                              |
| <i>Ipomoea leptophylla</i>       | Plantae | Displays senescence | 0.831 | Keeler, K. H. Survivorship and Recruitment in a Long-lived Prairie Perennial, <i>Ipomoea leptophylla</i> (Convolvulaceae). <i>American Midland Naturalist</i> . <b>126(1)</b> , 44. (1991).                                             |
| <i>Kosteletzkya pentacarpos</i>  | Plantae | Displays senescence | 0.904 | Pino, J., Pico, F. X., & De Roa, E. Population dynamics of the rare plant <i>Kosteletzkya pentacarpos</i> (Malvaceae): a nine-year study. <i>Botanical Journal of the Linnean Society</i> . <b>153(4)</b> , 455–462. (2007).            |
| <i>Lepanthes rupestris</i>       | Plantae | Escapes senescence  | 1.145 | Tremblay, R. L., & Ackerman J. D. Gene flow and effective population size in <i>Lepanthes</i> (Orchidaceae): a case for genetic drift. <i>Biological Journal of the Linnean Society</i> . <b>72(1)</b> , 47–62. (2001).                 |
| <i>Lepidium davisii</i>          | Plantae | Displays senescence | 0.390 | Bernatus, Report, 1995.                                                                                                                                                                                                                 |
| <i>Liatriis scariosa</i>         | Plantae | Displays senescence |       | Ellis, M. M. <i>et al.</i> Matrix population models from 20                                                                                                                                                                             |

|                              |         |                     |       |                                                                                                                                                                                                                                     |
|------------------------------|---------|---------------------|-------|-------------------------------------------------------------------------------------------------------------------------------------------------------------------------------------------------------------------------------------|
|                              |         |                     | 0.965 | studies of perennial plant populations. <i>Ecology</i> . <b>93(4)</b> , 951–951. (2012).                                                                                                                                            |
| <i>Limonium carolinianum</i> | Plantae | Displays senescence | 0.472 | Baltzer, J. L., Reekie, E. G., Hewlin, H. L., Taylor, P. D., & Boates, J. S. Impact of flower harvesting on the salt marsh plant <i>Limonium carolinianum</i> . <i>Canadian Journal of Botany</i> . <b>80(8)</b> , 841–851. (2002). |
| <i>Limonium erectum</i>      | Plantae | Displays senescence | 0.987 | Iriondo; Albert; Gimenez; Lozana; Escuerdo 978-84-8014-746-0                                                                                                                                                                        |
| <i>Limonium malacitanum</i>  | Plantae | Displays senescence | 0.842 | Iriondo; Albert; Gimenez; Lozana; Escuerdo 978-84-8014-746-0                                                                                                                                                                        |
| <i>Linum flavum</i>          | Plantae | Displays senescence | 0.305 | Münzbergová, Z. Comparative demography of two co-occurring <i>Linum</i> species with different distribution patterns. <i>Plant Biology</i> . <b>15(6)</b> , 963–970. (2013).                                                        |
| <i>Linum tenuifolium</i>     | Plantae | Displays senescence | 0.743 | Münzbergová, Z. Comparative demography of two co-occurring <i>Linum</i> species with different distribution patterns. <i>Plant Biology</i> . <b>15(6)</b> , 963–970. (2013).                                                        |
| <i>Lithospermum ruderale</i> | Plantae | Escapes senescence  | 1.185 | Bricker, M., & Maron, J. Post dispersal seed predation limits the abundance of a long-lived perennial forb ( <i>Lithospermum ruderale</i> ). <i>Ecology</i> . <b>93(3)</b> , 532–543. (2012).                                       |
| <i>Lomatium bradshawii</i>   | Plantae | Displays senescence | 0.765 | Kaye, T.N. & Pyke, D.A. The effect of stochastic technique on estimates of population viability from transition matrix models. <i>Ecology</i> . <b>84(6)</b> , 1464-1476 (2003).                                                    |
| <i>Lomatium cookii</i>       | Plantae | Displays senescence | 0.921 | Kaye, T.N. & Pyke, D.A. The effect of stochastic technique on estimates of population viability from transition matrix models. <i>Ecology</i> . <b>84(6)</b> , 1464-1476 (2003).                                                    |
| <i>Lotus arinagensis</i>     | Plantae | Displays senescence | 0.083 | Iriondo; Albert; Gimenez; Lozana; Escuerdo 978-84-8014-746-0                                                                                                                                                                        |
| <i>Oxalis acetosella</i>     | Plantae | Displays senescence | 0.767 | Berg, H. Population dynamics in <i>Oxalis acetosella</i> : the significance of sexual reproduction in a clonal, cleistogamous forest herb. <i>Ecography</i> . <b>25(2)</b> , 233–243. (2002).                                       |
| <i>Panax</i>                 | Plantae | Displays senescence |       | Charron, D., & Gagnon, D. The                                                                                                                                                                                                       |

|                            |         |                     |       |                                                                                                                                                                                                                                |
|----------------------------|---------|---------------------|-------|--------------------------------------------------------------------------------------------------------------------------------------------------------------------------------------------------------------------------------|
| <i>quinquefolius</i>       |         |                     | 0.801 | Demography of Northern Populations of <i>Panax Quinquefolium</i> (American Ginseng). <i>The Journal of Ecology</i> . <b>79(2)</b> , 431. (1991).                                                                               |
| <i>Pinguicula ionantha</i> | Plantae | Displays senescence | 0.581 | Kesler, H. C., Trusty, J. L., Hermann, S. M., & Guyer, C. Demographic responses of <i>Pinguicula ionantha</i> to prescribed fire: a regression-design LTRE approach. <i>Oecologia</i> . <b>156(3)</b> , 545–557. (2008).       |
| <i>Pinguicula vulgaris</i> | Plantae | Escapes senescence  | 1.217 | Svensson, B. M., Carlsson, B. A., Karlsson, P. S., & Nordell, K. O. Comparative Long-Term Demography of Three Species of <i>Pinguicula</i> . <i>The Journal of Ecology</i> . <b>81(4)</b> , 635. (1993).                       |
| <i>Plantago coronopus</i>  | Plantae | Displays senescence | 0.488 | Villellas, J. <i>et al.</i> Plant performance in central and northern peripheral populations of the widespread <i>Plantago coronopus</i> . <i>Ecography</i> . <b>36(2)</b> , 136-145. (2012).                                  |
| <i>Plantago media</i>      | Plantae | Displays senescence | 0.273 | Eriksson, Å., & Eriksson, O. Population dynamics of the perennial <i>Plantago media</i> in semi-natural grasslands. <i>Journal of Vegetation Science</i> . <b>11(2)</b> , 245–252. (2000).                                     |
| <i>Poa alpina</i>          | Plantae | Escapes senescence  | 1.291 | Marcante, S., Winkler, E., & Erschbamer, B. Population dynamics along a primary succession gradient: do alpine species fit into demographic succession theory? <i>Annals of Botany</i> . <b>103(7)</b> , 1129–1143. (2009).    |
| <i>Primula elatior</i>     | Plantae | Displays senescence | 0.093 | Jacquemyn, H., & Brys, R. Effects of stand age on the demography of a temperate forest herb in post-agricultural forests. <i>Ecology</i> . <b>89(12)</b> , 3480–3489. (2008).                                                  |
| <i>Primula veris</i>       | Plantae | Escapes senescence  | 0.430 | Lethilia, K., Syrjanen, K., Leimu, R., Garcia, M. B., & Ehrlén, J. Habitat Change and Demography of <i>Primula veris</i> : Identification of Management Targets. <i>Conservation Biology</i> . <b>20(3)</b> , 833–843. (2006). |
| <i>Primula vulgaris</i>    | Plantae | Displays senescence |       | Valdés, A., García, D., García, M. B., & Ehrlén, J. Contrasting effects of different landscape                                                                                                                                 |

|                                |         |                     |       |                                                                                                                                                                                                                                                   |
|--------------------------------|---------|---------------------|-------|---------------------------------------------------------------------------------------------------------------------------------------------------------------------------------------------------------------------------------------------------|
|                                |         |                     | 0.290 | characteristics on population growth of a perennial forest herb. <i>Ecography</i> . <b>37(3)</b> , 230–240. (2013).                                                                                                                               |
| <i>Ramonda myconi</i>          | Plantae | Escapes senescence  | 1.394 | Xavier Picó, F., & Riba, M. <i>Plant Ecology</i> . <b>161(1)</b> , 1–13. (2002).                                                                                                                                                                  |
| <i>Sarcocapnos pulcherrima</i> | Plantae | Displays senescence | 0.898 | Salinas, M. J., Suárez, V., & Blanca, G. Demographic structure of three species of <i>Sarcocapnos</i> ( <i>Fumariaceae</i> ) as a basis for their conservation. <i>Canadian Journal of Botany</i> . <b>80(4)</b> , 360–369. (2002).               |
| <i>Saxifraga aizoides</i>      | Plantae | Escapes senescence  | 1.355 | Marcante, S., Winkler, E., & Erschbamer, B. Population dynamics along a primary succession gradient: do alpine species fit into demographic succession theory? <i>Annals of Botany</i> . <b>103(7)</b> , 1129–1143. (2009).                       |
| <i>Saxifraga cotyledon</i>     | Plantae | Escapes senescence  | 1.136 | Dinnézt, P., & Nilsson, T. Population viability analysis of <i>Saxifraga cotyledon</i> , a perennial plant with semelparous rosettes. <i>Plant Ecology</i> . <b>159(1)</b> , 61–71. (2002).                                                       |
| <i>Silene acaulis</i>          | Plantae | Escapes senescence  | 1.865 | Morris, W. & Doak, D. Life history of the long-lived gynodioecious cushion plant <i>Silene acaulis</i> ( <i>Caryophyllaceae</i> ), inferred from size-based population projection matrices. <i>Am J Bot.</i> <b>85(6)</b> : 784. (1998).          |
| <i>Silene douglasii oraria</i> | Plantae | Displays senescence | 0.500 | Kephart, S. R., & Paladino, C. Demographic change and microhabitat Variability in a Grassland Endemic, <i>Silene Douglasii</i> Var. <i>oraria</i> ( <i>Caryophyllaceae</i> ). <i>American Journal of Botany</i> . <b>84(2)</b> , 179–189. (1997). |
| <i>Sporobolus heterolepis</i>  | Plantae | Displays senescence | 0.830 | Dalgleish, H. J., Kula, A. R., Hartnett, D. C., & Sandercock, B. K. Responses of two bunchgrasses to nitrogen addition in tallgrass prairie: the role of bud bank demography. <i>American Journal of Botany</i> . <b>95(6)</b> , 672–680. (2008). |

|                               |         |                     |       |                                                                                                                                                                                                                                                                    |
|-------------------------------|---------|---------------------|-------|--------------------------------------------------------------------------------------------------------------------------------------------------------------------------------------------------------------------------------------------------------------------|
|                               |         |                     | 0.364 | Jongejans, E., & De Kroon, H. Space versus time variation in the population dynamics of three co-occurring perennial herbs. <i>Journal of Ecology</i> . <b>93(4)</b> , 681–692. (2005).                                                                            |
| <i>Succisa pratensis</i>      | Plantae | Displays senescence |       |                                                                                                                                                                                                                                                                    |
|                               |         |                     | 0.976 | Iriondo; Albert; Gimenez; Lozana; Escuerdo 978-84-8014-746-0                                                                                                                                                                                                       |
| <i>Thymus vulgaris</i>        | Plantae | Displays senescence |       |                                                                                                                                                                                                                                                                    |
|                               |         |                     | 1.216 | Ohara, M., Takada, T., & Kawano, S. Demography and reproductive strategies of a polycarpic perennial, <i>Trillium apetalon</i> (Trilliaceae). <i>Plant Species Biology</i> . <b>16(3)</b> , 209–217. (2001).                                                       |
| <i>Trillium apetalon</i>      | Plantae | Escapes senescence  |       |                                                                                                                                                                                                                                                                    |
|                               |         |                     | 0.878 | Ohara, M., Tomimatsu, H., Takada, T., & Kawano, S. Importance of life history studies for conservation of fragmented populations: A case study of the understory herb, <i>Trillium camschatcense</i> . <i>Plant Species Biology</i> . <b>21(1)</b> , 1–12. (2006). |
| <i>Trillium camschatcense</i> | Plantae | Displays senescence |       |                                                                                                                                                                                                                                                                    |
|                               |         |                     | 1.394 | Knight, T. M. Effects of herbivory and its timing across populations of <i>Trillium grandiflorum</i> (Liliaceae). <i>American Journal of Botany</i> . <b>90(8)</b> , 1207–1214. (2003).                                                                            |
| <i>Trillium grandiflorum</i>  | Plantae | Escapes senescence  |       |                                                                                                                                                                                                                                                                    |
| <i>Trillium ovatum</i>        | Plantae | Escapes senescence  | 1.485 | Ream, PhD thesis, 2011.                                                                                                                                                                                                                                            |
| <i>Trillium persistens</i>    | Plantae | Displays senescence | 0.869 | Plank, MSc thesis, 2010.                                                                                                                                                                                                                                           |
|                               |         |                     | 0.959 | Scanga, S. E. Population dynamics in canopy gaps: nonlinear response to variable light regimes by an understory plant. <i>Plant Ecology</i> . <b>215(8)</b> , 927–935. (2014).                                                                                     |
| <i>Trollius laxus</i>         | Plantae | Displays senescence |       |                                                                                                                                                                                                                                                                    |
|                               |         |                     | 0.734 | Eckstein, R., Danihelka, J., & Otte, A. Variation in life-cycle between three rare and endangered floodplain violets in two regions: implications for population viability and conservation. <i>Biologia</i> . <b>64(1)</b> . (2009).                              |
| <i>Viola pumila</i>           | Plantae | Displays senescence |       |                                                                                                                                                                                                                                                                    |
|                               |         |                     |       | Sanchez-Velasquez, L. R., Ezcurra, E., Martinez-Ramos, M., Alvarez-Buylla, E., & Lorente, R. Population dynamics of <i>Zea diploperennis</i> , an endangered perennial herb: effect of slash and burn practice. <i>Journal of Ecology</i> .                        |
| <i>Zea diploperennis</i>      | Plantae | Displays senescence |       |                                                                                                                                                                                                                                                                    |

|                                   |         |                    |       |                                                                                                                                                                                                                                                                           |
|-----------------------------------|---------|--------------------|-------|---------------------------------------------------------------------------------------------------------------------------------------------------------------------------------------------------------------------------------------------------------------------------|
|                                   |         |                    | 0.645 | 90(4), 684–692. (2002).                                                                                                                                                                                                                                                   |
|                                   |         |                    | 1.646 | Wong, T. M., & Ticktin, T. Using population dynamics modelling to evaluate potential success of restoration: a case study of a Hawaiian vine in a changing climate. <i>Environmental Conservation</i> . <b>42(1)</b> , 20–30. (2014).                                     |
| <i>Alyxia stellata</i>            | Plantae | Escapes senescence |       |                                                                                                                                                                                                                                                                           |
|                                   |         |                    | 1.444 | Nabe-Nielsen, J. Demography of <i>Machaerium cuspidatum</i> , a shade-tolerant neotropical liana. <i>Journal of Tropical Ecology</i> . <b>20(5)</b> , 505–516. (2004).                                                                                                    |
| <i>Machaerium cuspidatum</i>      | Plantae | Escapes senescence |       |                                                                                                                                                                                                                                                                           |
|                                   |         |                    | 1.571 | Quitete Portela, R. de C., Bruna, E. M., & Maës dos Santos, F. A. Demography of palm species in Brazil's Atlantic forest: a comparison of harvested and unharvested species using matrix models. <i>Biodiversity and Conservation</i> . <b>19(8)</b> , 2389–2403. (2010). |
| <i>Astrocaryum aculeatissimum</i> | Plantae | Escapes senescence |       |                                                                                                                                                                                                                                                                           |
|                                   |         |                    | 1.561 | Pinero, D., Martinez-Ramos, M., & Sarukhan, J. A Population Model of <i>Astrocaryum Mexicanum</i> and a Sensitivity Analysis of its Finite Rate of Increase. <i>The Journal of Ecology</i> . <b>72(3)</b> , 977. (1984).                                                  |
| <i>Astrocaryum mexicanum</i>      | Plantae | Escapes senescence |       |                                                                                                                                                                                                                                                                           |
|                                   |         |                    | 1.763 | Barot, S., Gignoux, J., Vuattoux, R., & Legendre, S. Demography of a savanna palm tree in Ivory Coast (Lamto): population persistence and life-history. <i>Journal of Tropical Ecology</i> . <b>16(5)</b> , 637–655. (2000).                                              |
| <i>Borassus aethiopum</i>         | Plantae | Escapes senescence |       |                                                                                                                                                                                                                                                                           |
|                                   |         |                    | 1.508 | Binh, PhD thesis, 2009.                                                                                                                                                                                                                                                   |
| <i>Calamus nambariensis</i>       | Plantae | Escapes senescence |       |                                                                                                                                                                                                                                                                           |
|                                   |         |                    | 1.385 | Binh, PhD thesis, 2009.                                                                                                                                                                                                                                                   |
| <i>Calamus rhabdocladus</i>       | Plantae | Escapes senescence |       |                                                                                                                                                                                                                                                                           |
|                                   |         |                    | 1.227 | Valverde, T., Hernandez-Apolinar, M., & Mendoza-Amarom, S. Effect of Leaf Harvesting on the Demography of the Tropical Palm <i>Chamaedorea elegans</i> in South-Eastern Mexico. <i>Journal of Sustainable Forestry</i> . <b>23(1)</b> , 85–105. (2006).                   |
| <i>Chamaedorea elegans</i>        | Plantae | Escapes senescence |       |                                                                                                                                                                                                                                                                           |
|                                   |         |                    |       | Olmsted, I., & Alvarez-Buylla, E. R. Sustainable Harvesting of Tropical Trees: Demography and Matrix Models of Two Palm Species in Mexico. <i>Ecological</i>                                                                                                              |
| <i>Coccothrinax readii</i>        | Plantae | Escapes senescence |       |                                                                                                                                                                                                                                                                           |



|                                   |         |                    |       |                                                                                                                                                                                                                                                                                                                                                  |
|-----------------------------------|---------|--------------------|-------|--------------------------------------------------------------------------------------------------------------------------------------------------------------------------------------------------------------------------------------------------------------------------------------------------------------------------------------------------|
|                                   |         |                    | 2.344 | <i>Applications</i> . <b>5(2)</b> , 484–500. (1995).                                                                                                                                                                                                                                                                                             |
| <i>Daemonorops poilanei</i>       | Plantae | Escapes senescence | 1.515 | Binh, PhD thesis, 2009.                                                                                                                                                                                                                                                                                                                          |
| <i>Dioon caputoi</i>              | Plantae | Escapes senescence | 1.871 | Cabrera-Toledo, PhD thesis, 2009.                                                                                                                                                                                                                                                                                                                |
|                                   |         |                    |       | Lázaro-Zermeño, J. M., González-Espinosa, M., Mendoza, A., Martínez-Ramos, M., & Quintana-Ascencio, P. F. Individual growth, reproduction and population dynamics of <i>Dioon merolae</i> (Zamiaceae) under different leaf harvest histories in Central Chiapas, Mexico. <i>Forest Ecology and Management</i> . <b>261(3)</b> , 427–439. (2011). |
| <i>Dioon merolae</i>              | Plantae | Escapes senescence | 1.698 |                                                                                                                                                                                                                                                                                                                                                  |
| <i>Dioon spinulosum</i>           | Plantae | Escapes senescence | 2.323 | Casteneda MSc thesis, 2008.                                                                                                                                                                                                                                                                                                                      |
|                                   |         |                    |       | Raimondo, D. C., & Donaldson, J. S. Responses of cycads with different life histories to the impact of plant collecting: simulation models to determine important life history stages and population recovery times. <i>Biological Conservation</i> . <b>111(3)</b> , 345–358. (2003).                                                           |
| <i>Encephalartos cycadifolius</i> | Plantae | Escapes senescence | 2.935 |                                                                                                                                                                                                                                                                                                                                                  |
|                                   |         |                    |       | Kouassi, K. I., Barot, S., Gignoux, J., & Zoro Bi, I. A. Demography and life history of two rattan species, <i>Eremospatha macrocarpa</i> and <i>Laccosperma secundiflorum</i> , in Côte d'Ivoire. <i>Journal of Tropical Ecology</i> . <b>24(05)</b> , 493–503. (2008).                                                                         |
| <i>Eremospatha macrocarpa</i>     | Plantae | Escapes senescence | 1.115 |                                                                                                                                                                                                                                                                                                                                                  |
|                                   |         |                    |       | A. Arango, D., J. Duque, Á., & Muñoz, E. Dinámica poblacional de la palma <i>Euterpe oleracea</i> (Arecaceae) en bosques inundables del Chocó, Pacífico colombiano. <i>Revista de Biología Tropical</i> . <b>58(1)</b> . (2009).                                                                                                                 |
| <i>Euterpe oleracea</i>           | Plantae | Escapes senescence | 1.112 |                                                                                                                                                                                                                                                                                                                                                  |
|                                   |         |                    |       | Otárola, M. F., & Avalos, G. Demographic variation across successional stages and their effects on the population dynamics of the neotropical palm <i>Euterpe precatoria</i> . <i>American Journal of Botany</i> . <b>101(6)</b> , 1023–1028. (2014).                                                                                            |
| <i>Euterpe precatoria</i>         | Plantae | Escapes senescence | 1.051 |                                                                                                                                                                                                                                                                                                                                                  |
| <i>Geonoma pohliana</i>           | Plantae | Escapes senescence |       | Souza, A. F., & Martins, F. R. Demography of the clonal palm                                                                                                                                                                                                                                                                                     |

|                              |         |                     |  |       |                                                                                                                                                                                                                                                               |
|------------------------------|---------|---------------------|--|-------|---------------------------------------------------------------------------------------------------------------------------------------------------------------------------------------------------------------------------------------------------------------|
| <i>weddelliana</i>           |         |                     |  | 1.015 | <i>Geonoma brevispatha</i> in a Neotropical swamp forest. <i>Austral Ecology</i> . <b>31(7)</b> , 869–881. (2006).                                                                                                                                            |
| <i>Geonoma macrostachys</i>  | Plantae | Escapes senescence  |  | 1.618 | Svenning, J.-C. Crown illumination limits the population growth rate of a neotropical understorey palm ( <i>Geonoma macrostachys</i> ). <i>Plant Ecology</i> . <b>159(2)</b> , 185–199. (2002).                                                               |
| <i>Geonoma orbignyana</i>    | Plantae | Escapes senescence  |  | 1.248 | Rodríguez-Buriticá, S., Orjuela, M. A., & Galeano, G. Demography and life history of <i>Geonoma orbignyana</i> : An understory palm used as foliage in Colombia. <i>Forest Ecology and Management</i> . <b>211(3)</b> , 329–340. (2005).                      |
| <i>Geonoma schottiana</i>    | Plantae | Escapes senescence  |  | 1.889 | Sampaio, M. B., & Scariot, A. Effects of stochastic herbivory events on population maintenance of an understorey palm species ( <i>Geonoma schottiana</i> ) in riparian tropical forest. <i>Journal of Tropical Ecology</i> . <b>26(2)</b> , 151–161. (2010). |
| <i>Iriartea deltoidea</i>    | Plantae | Escapes senescence  |  | 1.304 | Pinard, M. Impacts of Stem Harvesting on Populations of <i>Iriartea deltoidea</i> (Palmae) in an Extractive Reserve in Acre, Brazil. <i>Biotropica</i> . <b>25(1)</b> , 2. (1993).                                                                            |
| <i>Mauritia flexuosa</i>     | Plantae | Escapes senescence  |  | 1.707 | Holm, J. A., Miller, C. J., & Cropper, W. P. Population Dynamics of the Dioecious Amazonian Palm <i>Mauritia flexuosa</i> : Simulation Analysis of Sustainable Harvesting. <i>Biotropica</i> . <b>40(5)</b> , 550–558. (2008).                                |
| <i>Dypsis decaryi</i>        | Plantae | Escapes senescence  |  | 2.000 | Ratsirarson, J., Silander, J. A., & Richard, A. F. Conservation and Management of a Threatened Madagascar Palm Species, <i>Neodypsis decaryi</i> , Jumelle. <i>Conservation Biology</i> . <b>10(1)</b> , 40–52. (1996).                                       |
| <i>Phytelephas seemannii</i> | Plantae | Escapes senescence  |  | 2.024 | Bernal, R. Demography of the vegetable ivory palm <i>Phytelephas seemannii</i> in Colombia, and the impact of seed harvesting. <i>Journal of Applied Ecology</i> . <b>35(1)</b> , 64–74. (1998).                                                              |
| <i>Podococcus barteri</i>    | Plantae | Displays senescence |  |       | Bullock, S. H. Demography of an Undergrowth Palm in Littoral                                                                                                                                                                                                  |

|                                  |         |                     |       |                                                                                                                                                                                                                                                                      |
|----------------------------------|---------|---------------------|-------|----------------------------------------------------------------------------------------------------------------------------------------------------------------------------------------------------------------------------------------------------------------------|
|                                  |         |                     | 0.865 | Cameroon. <i>Biotropica</i> . <b>12(4)</b> , 247. (1980).                                                                                                                                                                                                            |
| <i>Pseudophoenix sargentii</i>   | Plantae | Escapes senescence  | 1.695 | Duran; Franco, PhD thesis, 1992.                                                                                                                                                                                                                                     |
| <i>Rhopalostylis sapida</i>      | Plantae | Displays senescence | 0.648 | Enright, N. J., & Watson, A. D. Population dynamics of the nikau palm, <i>Rhopalostylis sapida</i> (Wendl. et Drude), in a temperate forest remnant near Auckland, New Zealand. <i>New Zealand Journal of Botany</i> . <b>30(1)</b> , 29–43. (1992).                 |
| <i>Sabal yapa</i>                | Plantae | Escapes senescence  | 1.656 | Pulido, M. T., Valverde, T., & Caballero, J. Variation in the population dynamics of the palm <i>Sabal yapa</i> in a landscape shaped by shifting cultivation in the Yucatan Peninsula, Mexico. <i>Journal of Tropical Ecology</i> . <b>23(2)</b> , 139–149. (2007). |
| <i>Thrinax radiata</i>           | Plantae | Escapes senescence  | 1.936 | Olmsted, I., & Alvarez-Buylla, E. R. Sustainable Harvesting of Tropical Trees: Demography and Matrix Models of Two Palm Species in Mexico. <i>Ecological Applications</i> . <b>5(2)</b> , 484–500. (1995).                                                           |
| <i>Ardisia elliptica</i>         | Plantae | Escapes senescence  | 2.388 | Koop, A. L., & Horvitz, C. C. Projection matrix analysis of the demography of an invasive, non-native shrub ( <i>Ardisia elliptica</i> ). <i>Ecology</i> , 86(10), 2661–2672. (2005).                                                                                |
| <i>Argyroxiphium sandwicense</i> | Plantae | Escapes senescence  | 1.317 | Forsyth, S. A. Density-dependent seed set in the Haleakala silversword: evidence for an Allee effect. <i>Oecologia</i> . <b>136(4)</b> , 551–557. (2003).                                                                                                            |
| <i>Atriplex acanthocarpa</i>     | Plantae | Displays senescence | 0.797 | Verhulst, J., Montaña, C., Mandujano, M. C., & Franco, M. Demographic mechanisms in the coexistence of two closely related perennials in a fluctuating environment. <i>Oecologia</i> . <b>156(1)</b> , 95–105. (2008).                                               |
| <i>Banksia ericifolia</i>        | Plantae | Escapes senescence  | 1.088 | Bradstock, R. A., & O'Connell, M. A. (1988). Demography of woody plants in relation to fire: <i>Banksia ericifolia</i> L.f. and <i>Petrophile pulchella</i> (Schrad) R.Br. <i>Austral Ecology</i> . <b>13(4)</b> , 505–518. (1988).                                  |
| <i>Cassia nemophila</i>          | Plantae | Escapes senescence  |       | Silander, J. A. Demographic variation in the Australian desert                                                                                                                                                                                                       |

|                              |         |                     |       |                                                                                                                                                                                                                                                                              |
|------------------------------|---------|---------------------|-------|------------------------------------------------------------------------------------------------------------------------------------------------------------------------------------------------------------------------------------------------------------------------------|
|                              |         |                     | 1.881 | cassia under grazing pressure. <i>Oecologia</i> . <b>60(2)</b> , 227–233. (1983).                                                                                                                                                                                            |
| <i>Cytisus scoparius</i>     | Plantae | Escapes senescence  | 1.334 | Neubert, M. G., & Parker, I. M. Projecting Rates of Spread for Invasive Species. <i>Risk Analysis</i> . <b>24(4)</b> , 817–831. (2004).                                                                                                                                      |
| <i>Daphne rodriguezii</i>    | Plantae | Escapes senescence  | 1.156 | Rodríguez-Pérez, J., & Traveset, A. Demographic consequences for a threatened plant after the loss of its only disperser. Habitat suitability buffers limited seed dispersal. <i>Oikos</i> . <b>121(6)</b> , 835–847. (2011).                                                |
| <i>Fumana procumbens</i>     | Plantae | Escapes senescence  | 1.032 | Bengtsson, K. <i>Fumana Procumbens</i> on Oland-- Population Dynamics of a Disjunct Species at the Northern Limit of its Range. <i>The Journal of Ecology</i> . <b>81(4)</b> , 745. (1993).                                                                                  |
| <i>Helianthemum juliae</i>   | Plantae | Displays senescence | 0.946 | Marrero-Gómez, M. V., Oostermeijer, J. G. B., Carqué-Álamo, E., & Bañares-Baudet, Á. Population viability of the narrow endemic <i>Helianthemum juliae</i> (CISTACEAE) in relation to climate variability. <i>Biological Conservation</i> . <b>136(4)</b> , 552–562. (2007). |
| <i>Lindera umbellata</i>     | Plantae | Escapes senescence  | 1.421 | Hara, M., Kanno, H., Hirabuki, Y., & Takehara, A. Population dynamics of four understorey shrub species in beech forest. <i>Journal of Vegetation Science</i> . <b>15(4)</b> , 475–484. (2004).                                                                              |
| <i>Linnaea borealis</i>      | Plantae | Displays senescence | 0.634 | Eriksson, O. Population structure and dynamics of the clonal dwarf-shrub <i>Linnaea borealis</i> . <i>Journal of Vegetation Science</i> . <b>3(1)</b> , 61–68. (1992).                                                                                                       |
| <i>Magnolia salicifolia</i>  | Plantae | Escapes senescence  | 1.770 | Hara, M., Kanno, H., Hirabuki, Y., & Takehara, A. Population dynamics of four understorey shrub species in beech forest. <i>Journal of Vegetation Science</i> . <b>15(4)</b> , 475–484. (2004).                                                                              |
| <i>Miconia albicans</i>      | Plantae | Escapes senescence  | 1.939 | Hoffmann, W. A. Fire and population dynamics of four understorey shrub species in beech forest. <i>Ecology</i> . <b>80(4)</b> , 1354–1369. (1999).                                                                                                                           |
| <i>Paliurus ramosissimus</i> | Plantae | Displays senescence |       | Ishihama, F., Fujii, S., Yamamoto, K., & Takada, T. Estimation of dieback process                                                                                                                                                                                            |

|                               |         |                     |       |                                                                                                                                                                                                                                                                                                        |
|-------------------------------|---------|---------------------|-------|--------------------------------------------------------------------------------------------------------------------------------------------------------------------------------------------------------------------------------------------------------------------------------------------------------|
|                               |         |                     | 0.986 | caused by herbivory in an endangered root-sprouting shrub species, <i>Paliurus ramosissimus</i> (Lour.) Poir., using a shoot-dynamics matrix model. <i>Population Ecology</i> . <b>56(2)</b> , 275–288. (2013).                                                                                        |
| <i>Persoonia glaucescens</i>  | Plantae | Escapes senescence  | 1.061 | McKenna, PhD thesis, 2007.                                                                                                                                                                                                                                                                             |
| <i>Purshia subintegra</i>     | Plantae | Displays senescence | 0.523 | Maschinski, J., Baggs, J. E., Quintana-Ascencio, P. F., & Menges, E. S. Using Population Viability Analysis to Predict the Effects of Climate Change on the Extinction Risk of an Endangered Limestone Endemic Shrub, Arizona Cliffrose. <i>Conservation Biology</i> . <b>20(1)</b> , 218–228. (2006). |
| <i>Rhododendron maximum</i>   | Plantae | Displays senescence | 0.546 | McGraw, J. B. Effects of age and size on life histories and population growth of <i>Rhododendron maximum</i> shoots. <i>American Journal of Botany</i> . <b>76(1)</b> , 113–123. (1989).                                                                                                               |
| <i>Rhus copallinum</i>        | Plantae | Displays senescence | 0.506 | Thaxton, PhD thesis, 2003.                                                                                                                                                                                                                                                                             |
| <i>Rourea induta</i>          | Plantae | Escapes senescence  | 1.362 | Hoffmann, W. A. Fire and population dynamics of four understorey shrub species in beech forest. <i>Ecology</i> . <b>80(4)</b> , 1354–1369. (1999).                                                                                                                                                     |
| <i>Verticordia staminosa</i>  | Plantae | Displays senescence | 0.775 | Yates, C. J., Ladd, P. G., Coates, D. J., & McArthur, S. Hierarchies of cause: understanding rarity in an endemic shrub <i>Verticordia staminosa</i> (Myrtaceae) with a highly restricted distribution. <i>Australian Journal of Botany</i> . <b>55(3)</b> , 194. (2007).                              |
| <i>Viburnum furcatum</i>      | Plantae | Escapes senescence  | 1.925 | Hara, M., Kanno, H., Hirabuki, Y., & Takehara, A. Population dynamics of four understorey shrub species in beech forest. <i>Journal of Vegetation Science</i> . <b>15(4)</b> , 475–484. (2004).                                                                                                        |
| <i>Astrophytum asterias</i>   | Plantae | Displays senescence | 0.960 | Martinez-Avalos, PhD thesis, 2007.                                                                                                                                                                                                                                                                     |
| <i>Astrophytum capricorne</i> | Plantae | Displays senescence | 0.468 | Bravo Espinoza, PhD thesis, 2011.                                                                                                                                                                                                                                                                      |
| <i>Astrophytum ornatum</i>    | Plantae | Escapes senescence  | 1.270 | V Zepeda-Martínez, MC Mandujano, FJ Mandujano, JK Golubov. What can the demography of <i>Astrophytum ornatum</i> tell us of its endangered status? <i>Journal of arid</i>                                                                                                                              |

|                                    |         |                     |       |                                                                                                                                                                                                                                                                                                                      |
|------------------------------------|---------|---------------------|-------|----------------------------------------------------------------------------------------------------------------------------------------------------------------------------------------------------------------------------------------------------------------------------------------------------------------------|
| <i>Cephalocereus senilis</i>       | Plantae | Displays senescence | 0.947 | <i>environments</i> . <b>88</b> , 244-249. (2013).<br>Cedillo Castillo, MSc thesis, 2007.                                                                                                                                                                                                                            |
| <i>Echinocactus platyacanthus</i>  | Plantae | Escapes senescence  | 2.021 | Jiménez-Sierra, C., Mandujano, M. C., & Eguiarte, L. E. Are populations of the candy barrel cactus ( <i>Echinocactus platyacanthus</i> ) in the desert of Tehuacán, Mexico at risk? Population projection matrix and life table response analysis. <i>Biological Conservation</i> . <b>135(2)</b> , 278–292. (2007). |
| <i>Escontria chiotilla</i>         | Plantae | Escapes senescence  | 1.260 | Ortega-Baes, PhD thesis, 2001.                                                                                                                                                                                                                                                                                       |
| <i>Coespeletia timotensis</i>      | Plantae | Displays senescence | 0.397 | Silva, J. F., Trevisan, M. C., Estrada, C. A., & Monasterio, M. Comparative demography of two giant caulescent rosettes ( <i>Espeletia timotensis</i> and <i>E. spicata</i> ) from the high tropical Andes. <i>Global Ecology and Biogeography</i> . <b>9(5)</b> , 403–413. (2000).                                  |
| <i>Harrisia fragrans</i>           | Plantae | Escapes senescence  | 1.595 | Rae, J. G., & Ebert, T. A. Demography of the Endangered Fragrant Prickly Apple Cactus, <i>Harrisia fragrans</i> . <i>International Journal of Plant Sciences</i> . <b>163(4)</b> , 631–640. (2002).                                                                                                                  |
| <i>Mammillaria crucigera</i>       | Plantae | Displays senescence | 0.060 | Contreras, C., & Valverde, T. Evaluation of the conservation status of a rare cactus ( <i>Mammillaria crucigera</i> ) through the analysis of its population dynamics. <i>Journal of Arid Environments</i> . <b>51(1)</b> , 89–102. (2002).                                                                          |
| <i>Mammillaria hernandezii</i>     | Plantae | Escapes senescence  | 1.788 | Rodriguez Ortega, PhD thesis, 2008.                                                                                                                                                                                                                                                                                  |
| <i>Mammillaria huitzilopochtli</i> | Plantae | Escapes senescence  | 1.263 | Martinez, A-F., Medina, G.I.M., Golubov, J., Montana, C. & Mandujano, M.C. Demography of an endangered epidemic rupicolous cactus. <i>Plant Ecology</i> . <b>210</b> , 53-66 (2010).                                                                                                                                 |
| <i>Mammillaria magnimamma</i>      | Plantae | Escapes senescence  | 1.663 | Valverde, T., Quijas, S., López-Villavicencio, M., & Castillo, S. Population dynamics of <i>Mammillaria magnimamma</i> (Cactaceae) in a lava-field in central Mexico. <i>Plant Ecology (formerly Vegetatio)</i> . <b>170(2)</b> ,                                                                                    |

|                                  |         |                     |       |                                                                                                                                                                                                                                                                                          |
|----------------------------------|---------|---------------------|-------|------------------------------------------------------------------------------------------------------------------------------------------------------------------------------------------------------------------------------------------------------------------------------------------|
|                                  |         |                     |       | 167–184. (2004).                                                                                                                                                                                                                                                                         |
| <i>Mammillaria mystax</i>        | Plantae | Displays senescence | 0.719 | Saldivar Sanches, Navarro Carbajal, Cact Suc Mex, 2012.                                                                                                                                                                                                                                  |
| <i>Mammillaria napina</i>        | Plantae | Escapes senescence  | 1.802 | Rodriguez Ortega, PhD thesis, 2008.                                                                                                                                                                                                                                                      |
| <i>Mammillaria pectinifera</i>   | Plantae | Escapes senescence  | 1.039 | Valverde, P.L. & Zavala-Hurtado, J.A. Assessing the ecological status of <i>Mammillaria pectinifera</i> Weber (cactaceae), a rare and threatened species endemic of the Tehuacan-Cuitcatlan Region in Central Mexico. <i>Journal of Arid Environments</i> . <b>64(2)</b> 193-208 (2006). |
| <i>Mammillaria supertexta</i>    | Plantae | Escapes senescence  | 1.069 | Avendano Calco, MSc thesis, 2007.                                                                                                                                                                                                                                                        |
| <i>Neobuxbaumia macrocephala</i> | Plantae | Escapes senescence  | 1.193 | Esparza-Olguin, L., Valverde, T. & Mandujano, M.C. Comparative demographic analysis of three <i>Neobuxbaumia</i> species (cactaceae) with differing degree of rarity. <i>Population Ecology</i> . <b>47(3)</b> 229-245 (2005).                                                           |
| <i>Neobuxbaumia mezcalaensis</i> | Plantae | Escapes senescence  | 1.849 | Esparza-Olguin, L., Valverde, T. & Mandujano, M.C. Comparative demographic analysis of three <i>Neobuxbaumia</i> species (cactaceae) with differing degree of rarity. <i>Population Ecology</i> . <b>47(3)</b> 229-245 (2005).                                                           |
| <i>Neobuxbaumia polylopha</i>    | Plantae | Escapes senescence  | 1.691 | Arroyo-Cosultchi, G., Golubov, J. & Mandujano, M.C. Pulse seedling recruitment on the population dynamics of a columnar cactus: Effect of an extreme rainfall event. <i>Acta Oecologica</i> . <b>71</b> , 52-60 (2016)                                                                   |
| <i>Neobuxbaumia tetetzo</i>      | Plantae | Escapes senescence  | 2.550 | Esparza-Olguin, L., Valverde, T. & Mandujano, M.C. Comparative demographic analysis of three <i>Neobuxbaumia</i> species (cactaceae) with differing degree of rarity. <i>Population Ecology</i> . <b>47(3)</b> 229-245 (2005).                                                           |
| <i>Opuntia macrocentra</i>       | Plantae | Escapes senescence  | 1.068 | Mandujano, M. C., Golubov, J., & Huenneke, L. F. Effect of reproductive modes and environmental heterogeneity in the population dynamics of a geographically widespread clonal desert cactus. <i>Population Ecology</i> . <b>49(2)</b> , 141–153. (2007).                                |

|                            |         |                     |       |                                                                                                                                                                                                             |
|----------------------------|---------|---------------------|-------|-------------------------------------------------------------------------------------------------------------------------------------------------------------------------------------------------------------|
| <i>Opuntia macrorhiza</i>  | Plantae | Displays senescence | 0.839 | Haridas, C. V., Keeler, K. H., & Tenhumberg, B. Variation in the local population dynamics of the short-lived <i>Opuntia macrorhiza</i> (Cactaceae). <i>Ecology</i> . <b>96</b> (3), 800–807. (2015).       |
| <i>Opuntia microdasys</i>  | Plantae | Escapes senescence  | 1.491 | Carrillo Angeles, PhD thesis, 2011.                                                                                                                                                                         |
| <i>Opuntia rastrera</i>    | Plantae | Escapes senescence  | 1.692 | Mandujano, M. C., Montañana, C., Franco, M., Golubov, J., & Flores-Martínez, A. Integration of demographic annual variability in a clonal desert cactus. <i>Ecology</i> . <b>82</b> (2), 344–359. (2001).   |
| <i>Abies concolor</i>      | Plantae | Escapes senescence  | 1.258 | Van Mantgem, P.J. & Stephenson, N.L. The accuracy of matrix population models for coniferous trees in the Sierra Nevada, California. <i>Journal of Ecology</i> . <b>93</b> (4), 737-747 (2005)              |
| <i>Abies magnifica</i>     | Plantae | Escapes senescence  | 1.172 | Van Mantgem, P.J. & Stephenson, N.L. The accuracy of matrix population models for coniferous trees in the Sierra Nevada, California. <i>Journal of Ecology</i> . <b>93</b> (4), 737-747 (2005)              |
| <i>Abies sachalinensis</i> | Plantae | Displays senescence | 0.912 | Hiura, T., & Fujiwara, K. Density-dependence and co-existence of conifer and broad-leaved trees in a Japanese northern mixed forest. <i>Journal of Vegetation Science</i> . <b>10</b> (6), 843–850. (1999). |
| <i>Acer palmatum</i>       | Plantae | Escapes senescence  | 2.191 | Tanaka, H. <i>et al.</i> Comparative demography of three coexisting Acer species in gaps and under closed canopy. <i>Journal of Vegetation Science</i> . <b>19</b> (1), 127–138. (2008).                    |
| <i>Acer pictum</i>         | Plantae | Escapes senescence  | 1.476 | Tanaka, H. <i>et al.</i> Comparative demography of three coexisting Acer species in gaps and under closed canopy. <i>Journal of Vegetation Science</i> . <b>19</b> (1), 127–138. (2008).                    |
| <i>Acer rufinerve</i>      | Plantae | Escapes senescence  | 1.984 | Tanaka, H. <i>et al.</i> Comparative demography of three coexisting Acer species in gaps and under closed canopy. <i>Journal of Vegetation Science</i> . <b>19</b> (1), 127–138. (2008).                    |
| <i>Aesculus turbinata</i>  | Plantae | Escapes senescence  | 2.265 | Kaneko, Y., Takada, T. & Kawana, S. Population biology of <i>Aesculus turbinata</i> : A                                                                                                                     |



|                              |         |                     |       |                                                                                                                                                                                                                                                                   |
|------------------------------|---------|---------------------|-------|-------------------------------------------------------------------------------------------------------------------------------------------------------------------------------------------------------------------------------------------------------------------|
|                              |         |                     |       | demographic analysis using transition matrices on a natural population along a riparian environmental gradient. <i>Plant Species Biology</i> . <b>14(1)</b> , 47-68. (1999).                                                                                      |
| <i>Ailanthus altissima</i>   | Plantae | Escapes senescence  | 1.066 | Burns, J. H. <i>et al.</i> Greater sexual reproduction contributes to differences in demography of invasive plants and their non-invasive relatives. <i>Ecology</i> . <b>94(5)</b> , 995–1004. (2013).                                                            |
| <i>Alnus incana rugosa</i>   | Plantae | Escapes senescence  | 1.186 | Huenneke, L. F., & Marks, P. L. Stem Dynamics of the Shrub <i>Alnus Incana</i> SSP. Rugosa: Transition Matrix Models. <i>Ecology</i> . <b>68(5)</b> , 1234–1242. (1987).                                                                                          |
| <i>Aquilaria crassna</i>     | Plantae | Escapes senescence  | 1.376 | Zhang, L., Brockelman, W. Y., & Allen, M. A. Matrix analysis to evaluate sustainability: The tropical tree <i>Aquilaria crassna</i> , a heavily poached source of agarwood. <i>Biological Conservation</i> . <b>141(6)</b> , 1676–1686. (2008).                   |
| <i>Aquilaria malaccensis</i> | Plantae | Displays senescence | 0.292 | Soehartono, T., & C. Newton, A. Conservation and sustainable use of tropical trees in the genus <i>Aquilaria</i> II. The impact of gaharu harvesting in Indonesia. <i>Biological Conservation</i> . <b>97(1)</b> , 29–41. (2001).                                 |
| <i>Aquilaria microcarpa</i>  | Plantae | Displays senescence | 0.568 | Soehartono, T., & C. Newton, A. Conservation and sustainable use of tropical trees in the genus <i>Aquilaria</i> II. The impact of gaharu harvesting in Indonesia. <i>Biological Conservation</i> . <b>97(1)</b> , 29–41. (2001).                                 |
| <i>Araucaria hunsteinii</i>  | Plantae | Escapes senescence  | 2.839 | Enright, N. J. Does <i>Araucaria hunsteinii</i> compete with its neighbours? <i>Austral Ecology</i> . <b>7(1)</b> , 97–99. (1982).                                                                                                                                |
| <i>Araucaria muelleri</i>    | Plantae | Escapes senescence  | 1.042 | Enright, N. J., Miller, B. P., Perry, G. L. W., Goldblum, D., & Jaffré, T. Stress-tolerator leaf traits determine population dynamics in the endangered New Caledonian conifer <i>Araucaria muelleri</i> . <i>Austral Ecology</i> . <b>39(1)</b> , 60–71. (2013). |
| <i>Avicennia germinans</i>   | Plantae | Escapes senescence  | 2.314 | Lopez-Hoffman, L., Ackerley, D. D., Aanten, N. P. R., Denoyer, J.                                                                                                                                                                                                 |

|                              |         |                     |       |                                                                                                                                                                                                                                                                                                                                                                                                                                                                           |
|------------------------------|---------|---------------------|-------|---------------------------------------------------------------------------------------------------------------------------------------------------------------------------------------------------------------------------------------------------------------------------------------------------------------------------------------------------------------------------------------------------------------------------------------------------------------------------|
| <i>Bertholletia excelsa</i>  | Plantae | Escapes senescence  | 3.151 | L., & Martinez-Ramos, M. Gap-dependence in mangrove life-history strategies: a consideration of the entire life cycle and patch dynamics. <i>Journal of Ecology</i> . <b>95(6)</b> , 1222–1233. (2007).<br>Zuidema, P. A., & Boot, R. G. A. Demography of the Brazil nut tree ( <i>Bertholletia excelsa</i> ) in the Bolivian Amazon: impact of seed extraction on recruitment and population dynamics. <i>Journal of Tropical Ecology</i> . <b>18(1)</b> , 1–31. (2002). |
| <i>Boswellia papyrifera</i>  | Plantae | Escapes senescence  | 1.410 | Groenendijk, P., Eshete, A., Sterck, F. J., Zuidema, P. A., & Bongers, F. Limitations to sustainable frankincense production: blocked regeneration, high adult mortality and declining populations. <i>Journal of Applied Ecology</i> . <b>49(1)</b> , 164–173. (2011).                                                                                                                                                                                                   |
| <i>Brosimum alicastrum</i>   | Plantae | Displays senescence | 0.201 | Peters, PhD thesis, 1989.                                                                                                                                                                                                                                                                                                                                                                                                                                                 |
| <i>Bursera glabrifolia</i>   | Plantae | Escapes senescence  | 2.262 | Hernández-Apolinar, M., Valverde, T., & Purata, S. Demography of <i>Bursera glabrifolia</i> , a tropical tree used for folk woodcrafting in Southern Mexico: An evaluation of its management plan. <i>Forest Ecology and Management</i> . <b>223(1-3)</b> , 139–151. (2006).                                                                                                                                                                                              |
| <i>Calocedrus decurrens</i>  | Plantae | Escapes senescence  | 1.583 | Van Mantgem, P. J., & Stephenson, N. L. The accuracy of matrix population model projections for coniferous trees in the Sierra Nevada, California. <i>Journal of Ecology</i> . <b>93(4)</b> , 737–747. (2005).                                                                                                                                                                                                                                                            |
| <i>Calocedrus macrolepis</i> | Plantae | Escapes senescence  | 1.201 | Chien, P. D., Zuidema, P. A., & Nghia, N. H. Conservation prospects for threatened Vietnamese tree species: results from a demographic study. <i>Population Ecology</i> . <b>50(2)</b> , 227–237. (2008).                                                                                                                                                                                                                                                                 |
| <i>Camellia japonica</i>     | Plantae | Escapes senescence  |       | Shimatani, I.K., Kubota, Y., Araki, K., Aikawa, S-I. & Manabe, T. Matrix models using fine size classes and their application to the population                                                                                                                                                                                                                                                                                                                           |

|                                 |         |                     |       |                                                                                                                                                                                                                                                             |
|---------------------------------|---------|---------------------|-------|-------------------------------------------------------------------------------------------------------------------------------------------------------------------------------------------------------------------------------------------------------------|
|                                 |         |                     | 2.147 | dynamics of tree species: Bayesian non-parametric estimation. <i>Plant Spp Biol.</i> <b>22(3)</b> , 175-190. (2007)                                                                                                                                         |
| <i>Castanea dentata</i>         | Plantae | Escapes senescence  | 1.987 | Davelos, A. L., & Jarosz, A. M. Demography of American chestnut populations: effects of a pathogen and a hyperparasite. <i>Journal of Ecology.</i> <b>92(4)</b> , 675–685. (2004).                                                                          |
| <i>Cecropia obtusifolia</i>     | Plantae | Displays senescence | 0.004 | Alvarez-Buylla, E. R. Density Dependence and Patch Dynamics in Tropical Rain Forests: Matrix Models and Applications to a Tree Species. <i>Am.Nat.</i> <b>143(1)</b> , 155–191. (1994).                                                                     |
| <i>Choerospondias axillaris</i> | Plantae | Displays senescence | 0.045 | Brodie, J. F., Helmy, O. E., Brockelman, W. Y., & Maron, J. L. Functional differences within a guild of tropical mammalian frugivores. <i>Ecology.</i> <b>90(3)</b> , 688–698. (2009).                                                                      |
| <i>Dacrydium elatum</i>         | Plantae | Escapes senescence  | 1.671 | Chien, P. D., Zuidema, P. A., & Nghia, N. H. Conservation prospects for threatened Vietnamese tree species: results from a demographic study. <i>Population Ecology.</i> <b>50(2)</b> , 227–237. (2008).                                                    |
| <i>Dicorynia guianensis</i>     | Plantae | Displays senescence | 0.709 | Picard, N., Ouédraogo, D., & Bar-Hen, A. Choosing classes for size projection matrix models. <i>Ecological Modelling.</i> <b>221(19)</b> , 2270–2279. (2010).                                                                                               |
| <i>Dicymbe altsonii</i>         | Plantae | Escapes senescence  | 2.731 | Zagt;Boot PhD thesis, 1997.                                                                                                                                                                                                                                 |
| <i>Duguetia neglecta</i>        | Plantae | Escapes senescence  | 2.301 | Zagt;Boot PhD thesis, 1997.                                                                                                                                                                                                                                 |
| <i>Eperua falcata</i>           | Plantae | Displays senescence | 0.778 | Chagneau, P., Mortier, F., & Picard, N. (2009). Designing permanent sample plots by using a spatially hierarchical matrix population model. <i>Journal of the Royal Statistical Society: Series C (Applied Statistics).</i> <b>58(3)</b> , 345–367. (2009). |
| <i>Fagus grandifolia</i>        | Plantae | Escapes senescence  | 1.285 | Batista, W. B., Platt, W. J., & Macchiavelli, R. E. Demography of a Shade-Tolerant Tree ( <i>Fagus grandifolia</i> ) in a Hurricane-Disturbed Forest. <i>Ecology.</i> <b>79(1)</b> , 38. (1998).                                                            |
| <i>Grias peruviana</i>          | Plantae | Escapes senescence  | 1.176 | Peters, <i>Ecol &amp; Manag Non-timber Forest Resources</i> , 1995.                                                                                                                                                                                         |
| <i>Guaiacum</i>                 | Plantae | Escapes senescence  | 2.145 | CITES, Plants Committee, 2008.                                                                                                                                                                                                                              |

*sanctum*

|                                      |         |                     |       |                                                                                                                                                                                                                                                                                                               |
|--------------------------------------|---------|---------------------|-------|---------------------------------------------------------------------------------------------------------------------------------------------------------------------------------------------------------------------------------------------------------------------------------------------------------------|
| <i>Guettarda viburnoides</i>         | Plantae | Displays senescence | 0.429 | Loayza, A. P., & Knight, T. Seed dispersal by pulp consumers, not “legitimate” seed dispersers, increases <i>Guettarda viburnoides</i> population growth. <i>Ecology</i> . <b>91(9)</b> , 2684–2695. (2010).                                                                                                  |
| <i>Himatanthus drasticus</i>         | Plantae | Escapes senescence  | 1.006 | Baldauf, C., Corrêa, C. E., Ferreira, R. C., & dos Santos, F. A. M. Assessing the effects of natural and anthropogenic drivers on the demography of <i>Himatanthus drasticus</i> (Apocynaceae): Implications for sustainable management. <i>Forest Ecology and Management</i> . <b>354</b> , 177–184. (2015). |
| <i>Juniperus procera</i>             | Plantae | Escapes senescence  | 2.455 | Couralet, C., Sass-Klaassen, U., Sterck, F., Bekele, T., & Zuidema, P. A. Combining dendrochronology and matrix modelling in demographic studies: An evaluation for <i>Juniperus procera</i> in Ethiopia. <i>Forest Ecology and Management</i> . <b>216(1-3)</b> , 317–330. (2005).                           |
| <i>Khaya senegalensis</i>            | Plantae | Escapes senescence  | 1.370 | Gaoue, O. G., & Ticktin, T. Effects of Harvest of Nontimber Forest Products and Ecological Differences between Sites on the Demography of African Mahogany. <i>Conservation Biology</i> . <b>24(2)</b> , 605–614. (2010).                                                                                     |
| <i>Magnolia macrophylla dealbata</i> | Plantae | Escapes senescence  | 1.484 | Sánchez-Velásquez, L. R., & Pineda-López, M. del R. Comparative demographic analysis in contrasting environments of <i>Magnolia dealbata</i> : an endangered species from Mexico. <i>Population Ecology</i> . <b>52(1)</b> , 203–210. (2009).                                                                 |
| <i>Magnolia fordiana</i>             | Plantae | Escapes senescence  | 1.106 | Chien, P. D., Zuidema, P. A., & Nghia, N. H. Conservation prospects for threatened Vietnamese tree species: results from a demographic study. <i>Population Ecology</i> . <b>50(2)</b> , 227–237. (2008).                                                                                                     |
| <i>Microberlinia bisulcata</i>       | Plantae | Escapes senescence  | 2.749 | Norghauer, J. M., & Newbery, D. M. Seed fate and seedling dynamics after masting in two African rain forest trees. <i>Ecological Monographs</i> . <b>81(3)</b> , 443–469. (2011).                                                                                                                             |

|                                 |         |                     |       |                                                                                                                                                                                                                                                                                                      |
|---------------------------------|---------|---------------------|-------|------------------------------------------------------------------------------------------------------------------------------------------------------------------------------------------------------------------------------------------------------------------------------------------------------|
| <i>Parashorea chinensis</i>     | Plantae | Escapes senescence  | 1.545 | Chien, P. D., Zuidema, P. A., & Nghia, N. H. Conservation prospects for threatened Vietnamese tree species: results from a demographic study. <i>Population Ecology</i> . <b>50(2)</b> , 227–237. (2008).                                                                                            |
| <i>Parkinsonia aculeata</i>     | Plantae | Displays senescence | 0.334 | Raghu, S., Wilson, J. R., & Dhileepan, K. Refining the process of agent selection through understanding plant demography and plant response to herbivory. <i>Australian Journal of Entomology</i> . <b>45(4)</b> , 308–316. (2006).                                                                  |
| <i>Pentaclethra macroloba</i>   | Plantae | Escapes senescence  | 1.147 | Hartshorn, PhD thesis, 1972.                                                                                                                                                                                                                                                                         |
| <i>Phyllanthus emblica</i>      | Plantae | Escapes senescence  | 1.142 | Ellis, M. M. <i>et al.</i> Matrix population models from 20 studies of perennial plant populations. <i>Ecology</i> . <b>93(4)</b> , 951–951. (2012).                                                                                                                                                 |
| <i>Phyllanthus indofischeri</i> | Plantae | Escapes senescence  | 1.370 | Ticktin, T., Ganesan, R., Paramesha, M., & Setty, S. Disentangling the effects of multiple anthropogenic drivers on the decline of two tropical dry forest trees. <i>Journal of Applied Ecology</i> . <b>49(4)</b> , 774–784. (2012).                                                                |
| <i>Pinus fenzeliana</i>         | Plantae | Escapes senescence  | 1.720 | Chien, P. D., Zuidema, P. A., & Nghia, N. H. Conservation prospects for threatened Vietnamese tree species: results from a demographic study. <i>Population Ecology</i> . <b>50(2)</b> , 227–237. (2008).                                                                                            |
| <i>Pinus lambertiana</i>        | Plantae | Escapes senescence  | 1.248 | Van Mantgem, P. J., & Stephenson, N. L. The accuracy of matrix population model projections for coniferous trees in the Sierra Nevada, California. <i>Journal of Ecology</i> . <b>93(4)</b> , 737–747. (2005).                                                                                       |
| <i>Manilkara zapota</i>         | Plantae | Escapes senescence  | 1.481 | Cruz-Rodríguez, J. A., López-Mata, L., & Valverde, T. A comparison of traditional elasticity and variance-standardized perturbation analyses: a case study with the tropical tree species <i>Manilkara zapota</i> (Sapotaceae). <i>Journal of Tropical Ecology</i> . <b>25(2)</b> , 135–146. (2009). |

|                               |         |                     |       |                                                                                                                                                                                                                                                                                             |
|-------------------------------|---------|---------------------|-------|---------------------------------------------------------------------------------------------------------------------------------------------------------------------------------------------------------------------------------------------------------------------------------------------|
| <i>Pinus maximartinezii</i>   | Plantae | Escapes senescence  | 2.440 | López-Mata, L. The impact of seed extraction on the population dynamics of <i>Pinus maximartinezii</i> . <i>Acta Oecologica</i> , <b>49</b> , 39–44. (2013).                                                                                                                                |
| <i>Pinus nigra</i>            | Plantae | Escapes senescence  | 1.780 | Buckley, Y. M. <i>et al.</i> Slowing down a pine invasion despite uncertainty in demography and dispersal. <i>Journal of Applied Ecology</i> . <b>42(6)</b> , 1020–1030. (2005).                                                                                                            |
| <i>Pinus ponderosa</i>        | Plantae | Escapes senescence  | 1.034 | Buckley, Y. M. <i>et al.</i> Slowing down a pine invasion despite uncertainty in demography and dispersal. <i>Journal of Applied Ecology</i> . <b>42(6)</b> , 1020–1030. (2005).                                                                                                            |
| <i>Pinus strobus</i>          | Plantae | Escapes senescence  | 2.661 | Münzbergová, Z., Hadincová, V., Wild, J., & Kindlmannová, J. (2013). Variability in the Contribution of Different Life Stages to Population Growth as a Key Factor in the Invasion Success of <i>Pinus strobus</i> . <i>PLoS ONE</i> . <b>8(2)</b> , e56953. (2013).                        |
| <i>Pinus sylvestris</i>       | Plantae | Displays senescence | 0.375 | Usher, M. B. A Matrix Approach to the Management of Renewable Resources, with Special Reference to Selection Forests. <i>The Journal of Applied Ecology</i> . <b>3(2)</b> , 355. (1966).                                                                                                    |
| <i>Prosopis flexuosa</i>      | Plantae | Escapes senescence  | 2.249 | Aschero, V., Morris, W. F., Vázquez, D. P., Alvarez, J. A., & Villagra, P. E. Demography and population growth rate of the tree <i>Prosopis flexuosa</i> with contrasting grazing regimes in the Central Monte Desert. <i>Forest Ecology and Management</i> . <b>369</b> , 184–190. (2016). |
| <i>Prunus africana</i>        | Plantae | Displays senescence | 0.150 | Stewart, PhD thesis, 2001.                                                                                                                                                                                                                                                                  |
| <i>Prunus serotina</i>        | Plantae | Displays senescence | 0.440 | Sebert-Cuvillier, E. <i>et al.</i> Local population dynamics of an invasive tree species with a complex life-history cycle: A stochastic matrix model. <i>Ecological Modelling</i> . <b>201(2)</b> , 127–143. (2007).                                                                       |
| <i>Pterocarpus angolensis</i> | Plantae | Escapes senescence  | 1.770 | Desmet, P.G., Shackleton, C.M. & Robinson, E.R. The population dynamics and life-history attributes of a <i>Pterocarpus angolensis</i> population in the Northern Province, South Africa.                                                                                                   |

|                              |         |                     |       |                                                                                                                                                                                                                                                                                 |
|------------------------------|---------|---------------------|-------|---------------------------------------------------------------------------------------------------------------------------------------------------------------------------------------------------------------------------------------------------------------------------------|
|                              |         |                     |       | South African <i>Journal of Botany</i> . <b>62(3)</b> 160-166. (1996).                                                                                                                                                                                                          |
| <i>Quercus rugosa</i>        | Plantae | Escapes senescence  | 1.698 | Bonil; Valverde (unpublished).                                                                                                                                                                                                                                                  |
|                              |         |                     |       | Lopez Hoffman, L., Ackerly, D. D., Anten, N. P. R., Denoyer, J. L., & Martinez-Ramos, M. (2007). Gap-dependence in mangrove life-history strategies: a consideration of the entire life cycle and patch dynamics. <i>Journal of Ecology</i> . <b>95(6)</b> , 1222–1233. (2007). |
| <i>Rhizophora mangle</i>     | Plantae | Displays senescence | 0.405 |                                                                                                                                                                                                                                                                                 |
| <i>Rhododendron ponticum</i> | Plantae | Escapes senescence  | 1.332 | Salguero-Gomez, MSc thesis, 2004.                                                                                                                                                                                                                                               |
|                              |         |                     |       | Yamada, T. <i>et al.</i> Strong habitat preference of a tropical rain forest tree does not imply large differences in population dynamics across habitats. <i>Journal of Ecology</i> . <b>95(2)</b> , 332–342. (2007).                                                          |
| <i>Scaphium macropodum</i>   | Plantae | Escapes senescence  | 1.127 |                                                                                                                                                                                                                                                                                 |
|                              |         |                     |       | Yamada, T., Yamada, Y., Okuda, T., & Fletcher, C. Soil-related variations in the population dynamics of six dipterocarp tree species with strong habitat preferences. <i>Oecologia</i> . <b>172(3)</b> , 713–724. (2012).                                                       |
| <i>Shorea acuminata</i>      | Plantae | Escapes senescence  | 1.168 |                                                                                                                                                                                                                                                                                 |
|                              |         |                     |       | Yamada, T., Yamada, Y., Okuda, T., & Fletcher, C. Soil-related variations in the population dynamics of six dipterocarp tree species with strong habitat preferences. <i>Oecologia</i> . <b>172(3)</b> , 713–724. (2012).                                                       |
| <i>Shorea bracteolata</i>    | Plantae | Escapes senescence  | 1.064 |                                                                                                                                                                                                                                                                                 |
|                              |         |                     |       | Yamada, T., Yamada, Y., Okuda, T., & Fletcher, C. Soil-related variations in the population dynamics of six dipterocarp tree species with strong habitat preferences. <i>Oecologia</i> . <b>172(3)</b> , 713–724. (2012).                                                       |
| <i>Shorea leprosula</i>      | Plantae | Escapes senescence  | 1.465 |                                                                                                                                                                                                                                                                                 |
|                              |         |                     |       | Yamada, T., Yamada, Y., Okuda, T., & Fletcher, C. Soil-related variations in the population dynamics of six dipterocarp tree species with strong habitat preferences. <i>Oecologia</i> . <b>172(3)</b> , 713–724. (2012).                                                       |
| <i>Shorea maxwelliana</i>    | Plantae | Escapes senescence  | 1.010 |                                                                                                                                                                                                                                                                                 |
| <i>Shorea ovalis</i>         | Plantae | Escapes senescence  |       | Yamada, T., Yamada, Y., Okuda, T., & Fletcher, C. Soil-related variations in the population                                                                                                                                                                                     |

|                                      |         |                     |       |                                                                                                                                                                                                                                                               |
|--------------------------------------|---------|---------------------|-------|---------------------------------------------------------------------------------------------------------------------------------------------------------------------------------------------------------------------------------------------------------------|
|                                      |         |                     | 1.072 | dynamics of six dipterocarp tree species with strong habitat preferences. <i>Oecologia</i> , <b>172</b> (3), 713–724. (2012).                                                                                                                                 |
| <i>Stryphnodendron microstachyum</i> | Plantae | Escapes senescence  | 2.009 | Hartshorn, PhD thesis, 1972.                                                                                                                                                                                                                                  |
| <i>Styrax obassis</i>                | Plantae | Escapes senescence  | 1.443 | Abe, S., Nakashizuka, T., & Tanaka, H. Effects of canopy gaps on the demography of the subcanopy tree <i>Styrax obassis</i> . <i>Journal of Vegetation Science</i> , <b>9</b> (6), 787–796. (1998).                                                           |
| <i>Swietenia macrophylla</i>         | Plantae | Escapes senescence  | 1.325 | Verwer, C., Peña-Claros, M., van der Staak, D., Ohlson-Kiehn, K., & Sterck, F. J. (2008). Silviculture enhances the recovery of overexploited mahogany <i>Swietenia macrophylla</i> . <i>Journal of Applied Ecology</i> , <b>45</b> (6), 1770–1779. (2008).   |
| <i>Syzygium jambos</i>               | Plantae | Escapes senescence  | 1.176 | Brown, K. A., Spector, S., & Wu, W. Multi-scale analysis of species introductions: combining landscape and demographic models to improve management decisions about non-native species. <i>Journal of Applied Ecology</i> , <b>45</b> (6), 1639–1648. (2008). |
| <i>Taxus floridana</i>               | Plantae | Displays senescence | 0.372 | Kwit, C., Horvitz, C. C., & Platt, W. J. Conserving Slow-Growing, Long-Lived Tree Species: Input from the Demography of a Rare Understory Conifer, <i>Taxus floridana</i> . <i>Conservation Biology</i> , <b>18</b> (2), 432–443. (2004).                     |
| <i>Tetraberlinia bifoliolata</i>     | Plantae | Escapes senescence  | 1.452 | Norghauer, J. M., & Newbery, D. M. Seed fate and seedling dynamics after masting in two African rain forest trees. <i>Ecological Monographs</i> , <b>81</b> (3), 443–469. (2011).                                                                             |
| <i>Tsuga canadensis</i>              | Plantae | Escapes senescence  | 1.378 | Lamar, W. R., & McGraw, J. B. Evaluating the use of remotely sensed data in matrix population modeling for eastern hemlock ( <i>Tsuga canadensis</i> L.). <i>Forest Ecology and Management</i> , <b>212</b> (1-3), 50–64. (2005).                             |
| <i>Vatica mangachapoi</i>            | Plantae | Displays senescence | 0.278 | Hu; Wang. <i>Acta Ecol Sin.</i> (1988).                                                                                                                                                                                                                       |



|                                 |         |                     |       |                                                                                                                                                                                                                                                                                           |
|---------------------------------|---------|---------------------|-------|-------------------------------------------------------------------------------------------------------------------------------------------------------------------------------------------------------------------------------------------------------------------------------------------|
| <i>Vochysia ferruginea</i>      | Plantae | Displays senescence | 0.641 | Boucher, D. H., & Mallona, M. A. Recovery of the rain forest tree <i>Vochysia ferruginea</i> over 5 years following Hurricane Joan in Nicaragua: a preliminary population projection matrix. <i>Forest Ecology and Management</i> , <b>91(2-3)</b> , 195–204. (1997).                     |
| <i>Astragalus bibullatus</i>    | Plantae | Displays senescence | 0.157 | Bernardo, H. L., Albrecht, M. A., & Knight, T. M. Increased drought frequency alters the optimal management strategy of an endangered plant. <i>Biological Conservation</i> . <b>203</b> , 243-251. (2016).                                                                               |
| <i>Centaurea corymbosa</i>      | Plantae | Displays senescence | 0.456 | Hadjou Belaid, A. <i>et al.</i> Predicting population viability of the narrow endemic Mediterranean plant <i>Centaurea corymbosa</i> under climate change. <i>Biological Conservation</i> . <b>223</b> , 19-33. (2018).                                                                   |
| <i>Melocatus bahiensis</i>      | Plantae | Escapes senescence  | 1.195 | Hughes, F. M., Figueira, J. E. C., Jacobi, C. M., & Borba, E. L. Demographic processes and anthropogenic threats of lithophytic cacti in eastern Brazil. <i>Brazilian Journal of Botany</i> . <b>41(3)</b> , 631-640. (2018).                                                             |
| <i>Melocatus ernestii</i>       | Plantae | Escapes senescence  | 1.496 | Hughes, F. M., Figueira, J. E. C., Jacobi, C. M., & Borba, E. L. Demographic processes and anthropogenic threats of lithophytic cacti in eastern Brazil. <i>Brazilian Journal of Botany</i> . <b>41(3)</b> , 631-640. (2018).                                                             |
| <i>Verticordia fimbriolepis</i> | Plantae | Displays senescence | 0.640 | Yates, C. J., & Ladd, P. G. Using population viability analysis to predict the effect of fire on the extinction risk of an endangered shrub <i>Verticordia fimbriolepis</i> subsp. <i>fimbriolepis</i> in a fragmented landscape. <i>Plant Ecology</i> . <b>211(2)</b> , 305-319. (2010). |
| <i>Caladenia argocalla</i>      | Plantae | Displays senescence | 0.664 | Tremblay, R. L. <i>et al.</i> Population dynamics of <i>Caladenia</i> : Bayesian estimates of transition and extinction probabilities. <i>Australian Journal of Botany</i> . <b>57(4)</b> , 351. (2009).                                                                                  |
| <i>Caladenia elegans</i>        | Plantae | Displays senescence |       | Tremblay, R. L. <i>et al.</i> Population dynamics of <i>Caladenia</i> : Bayesian estimates of transition and                                                                                                                                                                              |

|                               |         |                     |       |                                                                                                                                                                                                                                                                      |
|-------------------------------|---------|---------------------|-------|----------------------------------------------------------------------------------------------------------------------------------------------------------------------------------------------------------------------------------------------------------------------|
|                               |         |                     | 0.820 | extinction probabilities. <i>Australian Journal of Botany</i> . <b>57(4)</b> , 351. (2009). <i>Journal of Botany</i> , 57(4), 351.                                                                                                                                   |
| <i>Caladenia macroclavia</i>  | Plantae | Displays senescence | 0.652 | Tremblay, R. L. <i>et al.</i> Population dynamics of <i>Caladenia</i> : Bayesian estimates of transition and extinction probabilities. <i>Australian Journal of Botany</i> . <b>57(4)</b> , 351. (2009).                                                             |
| <i>Cirsium pitcher</i>        | Plantae | Displays senescence | 0.687 | Halsey, S. J., Bell, T. J., McEachern, K., & Pavlovic, N. B. Population-specific life histories contribute to metapopulation viability. <i>Ecosphere</i> . 7(11), 15-36. (2016).                                                                                     |
| <i>Cyrtandra dentata</i>      | Plantae | Displays senescence | 0.824 | Bialic-Murphy, L., Gaoue, O. G., & Kawelo, K. Microhabitat heterogeneity and a non-native avian frugivore drive the population dynamics of an island endemic shrub, <i>Cyrtandra dentata</i> . <i>Journal of Applied Ecology</i> . <b>54(5)</b> , 1469-1477. (2017). |
| <i>Dendrophylax lindenii</i>  | Plantae | Escapes senescence  | 1.051 | Raventos J., Gonzalez, E., Mujica, E., & Doak, D. F. Population Viability Analysis of the Epiphytic Ghost Orchid ( <i>Dendrophylax lindenii</i> ) in Cuba. <i>Biotropica</i> . <b>47(2)</b> , 179-189. (2015).                                                       |
| <i>Echinacea angustifolia</i> | Plantae | Escapes senescence  | 1.013 | Dykstra, PhD thesis, 2013.                                                                                                                                                                                                                                           |
| <i>Frasera speciose</i>       | Plantae | Displays senescence | 0.049 | Che-Castaldo, J. P., & Inouye, D. W. The effects of dataset length and mast seeding on the demography of <i>Frasera speciosa</i> , a long-lived monocarpic plant. <i>Ecosphere</i> . <b>2(11)</b> , 126. (2011).                                                     |
| <i>Lepanthes rubripetala</i>  | Plantae | Escapes senescence  | 1.786 | Schödelbauerová I., Tremblay, R. L., & Kindlmann, P. Prediction vs. reality: Can a PVA model predict population persistence 13 years later? <i>Biodiversity and Conservation</i> . <b>19(3)</b> , 637-650. (2009).                                                   |
| <i>Vella pseudocytisus</i>    | Plantae | Displays senescence |       | Lozano, F. D., Saiz, J. C. M., & Schwartz, M. W. Demographic                                                                                                                                                                                                         |

|            |                                                                                                                                          |
|------------|------------------------------------------------------------------------------------------------------------------------------------------|
| <i>pau</i> | modeling and monitoring cycle in a long-lived endangered shrub. <i>Journal for Nature Conservation</i> . <b>19(6)</b> , 330-338. (2011). |
| 0.916      |                                                                                                                                          |

|                      |         |                    |       |                                                                                                                                                                                                          |
|----------------------|---------|--------------------|-------|----------------------------------------------------------------------------------------------------------------------------------------------------------------------------------------------------------|
| <i>Zamia inermis</i> | Plantae | Escapes senescence | 1.820 | Octavio-Aguilar, P. <i>et al.</i> Extinction risk of <i>Zamia inermis</i> : a demographic study in its single natural population. <i>Biodiversity and Conservation</i> . <b>26(4)</b> , 787-800. (2017). |
|----------------------|---------|--------------------|-------|----------------------------------------------------------------------------------------------------------------------------------------------------------------------------------------------------------|

442 **Supplementary Methods: ‘R’ computer code to extract age trajectories of fertility and**  
 443 **mortality from population projection matrices, and to calculate Keyfitz’ entropy.**

444

445 #Code to quantify lx, mx and H, as calculated in:

446 #Senescence: Still an Unsolved Problem of Biology

447 #Mark Roper, Pol Capdevila & Roberto Salguero-Gómez

448 #Submitted to Nature.

449 #Code adapted by P.Capdevila (University of Oxford) and M.Roper (University of Oxford) from Jones et al.  
 450 Diversity of ageing across the tree of life. *Nature*. 2014.

451 #Email: Mark Roper <mark.roper@keble.ox.ac.uk>

452 #Using equations from H. Caswell (2001) Matrix Population Models. 2nd Edition. #Sinauer, Sunderland, MA.  
 453 Specific equations and pages within the references are #cited in each of the functions below.

454 #Last modified: June 18th, 2019

455 #Packages necessary:

456 require(MASS, popbio, popdemo)

457 ###Functions

458 #Function to trim down lx and mx at a given percentage before stationary convergence (See Methods).

459 qsdConvergence <- function(survMatrix, beginLife){

460 uDim <- dim(survMatrix)

461 eig <- eigen.analysis(survMatrix)

462 qsd <- eig\$stable.stage

463 qsd <- as.numeric(t(matrix(qsd / sum(qsd))))

464 #Set up a cohort

```
465     nzero <- rep(0, uDim[1]) #Set a population vector of zeros
466     nzero[beginLife] <- 1 #Set the first stage to =1
467     n <- nzero #Rename for convenience
468     #Iterate the cohort (n= cohort population vector, p = proportional structure)
469     dist <- p <- NULL
470     survMatrix1 <- survMatrix
471     for (j in 1:1500){ #j represent years of iteration
472         p <- n / sum(n) #Get the proportional distribution
473         dist[j] <- 0.5 * (sum(abs(p - qsd)))
474         n <- survMatrix1 %*% n #Multiply the u and n matrices to iterate
475     }
476     #Find the ages for convergence to 0.1, 0.05, and 0.01
477     pick1 <- min(which(dist < 0.1))
478     pick2 <- min(which(dist < 0.05))
479     pick3 <- min(which(dist < 0.01))
480     convage <- c(pick1, pick2, pick3)
481     return(convage)
482 }
483
484 #Function to determine probability of reaching reproduction, age at maturity and reproductive lifespan (Code
485 adapted from H. Caswell's matlab code):
486 lifeTimeRepEvents <- function(matU, matF, startLife = 1){
487     uDim <- dim(matU)[1]
488     surv <- colSums(matU)
489     repLifeStages <- colSums(matF)
490     repLifeStages[which(repLifeStages>0)] <- 1
491     if(missing(matF) | missing(matU)){stop('matU or matF missing')}
492     if(sum(matF,na.rm=T)==0){stop('matF contains only 0 values')}
493
494     #Age at first reproduction (La; Caswell 2001, p 124)
495     D <- diag(c(Bprime[2,]))
496     Uprimecond <- D%*%Uprime%*%ginv(D)
497     expTimeReprod <- colSums(ginv(diag(uDim)-Uprimecond))
498     out$La <- expTimeReprod[startLife]
499 }
500
```

```
501 #Function to create a life table
502 makeLifeTable<-function(matU, matF = NULL, matC = NULL, startLife = 1, nSteps = 1000){
503   matDim <- ncol(matU)
504   #Age-specific survivorship (lx) (See top function on page 120 in Caswell 2001):
505   matUtemp <- matU
506   survivorship <- array(NA, dim = c(nSteps, matDim))
507   for (o in 1:nSteps){
508     survivorship[o, ] <- colSums(matUtemp %**% matU)
509     matUtemp <- matUtemp %**% matU
510   }
511
512   lx <- survivorship[, startLife]
513   lx <- c(1, lx[1:(length(lx) - 1)])
514
515   #Start to assemble output object where we will store the data
516   out <- data.frame(x = 0:(length(lx)-1),lx = lx)
517
518   if(!missing(matF)){
519     if(sum(matF,na.rm=T)==0){
520       warning("matF contains only 0 values")
521     }
522   #Age-specific fertility (mx, Caswell 2001, p. 120)
523   ageFertility <- array(0, dim = c(nSteps, matDim))
524   fertMatrix <- array(0, dim = c(nSteps, matDim))
525   matUtemp2 <- matU
526   e <- matrix(rep(1, matDim))
527   for (q in 1:nSteps) {
528     fertMatrix <- matF %**% matUtemp2 * (as.numeric((ginv(diag(t(e) %**% matUtemp2))))))
529     ageFertility[q, ] <- colSums(fertMatrix)
530     matUtemp2 <- matUtemp2 %**% matU
531   }
532   mx <- ageFertility[, startLife]
533   mx <- c(0, mx[1:(length(mx) - 1)])
534   out$mx <- mx
535 }
536
```

```
537  ##Calculations from COMPADRE and COMADRE
538  #Upload COMPADRE and COMADRE
539  load("COMADRE_v.3.0.0.RData")
540  load("COMPADRE_v.5.0.0.RData")
541  indexPopCOMADRE=1:dim(comadre$metadata)[1]
542  indexPopCOMPADRE=1:dim(compadre$metadata)[1]
543  allPopIndex<- c(indexPopCOMADRE,indexPopCOMPADRE)
544  ###Loop to obtain demographic quantities
545  longPop<- dim(compadre$metadata)[1]
546  output<- data.frame("SpeciesAccepted"<- rep(NA,longPop),
547                    "MatrixDimension"<- rep(NA,longPop),
548
549                    "H"<- rep(NA,longPop),
550                    "La"<- rep(NA,longPop),
551                    "lx"<- rep(NA,longPop),
552                    "ux"<- rep(NA,longPop),
553                    "mx"<- rep(NA,longPop))
554
555  #Start the loop to make the calculations
556  for (i in 1:longPop){
557    index<- allPopIndex[i]
558    if (i<=length(indexPopCOMADRE)) {d=comadre} else {d=compadre}
559    #Define the name of the species
560    output[i,c("SpeciesAccepted")]<- unlist(lapply(d$metadata[index,c("SpeciesAccepted")], as.character))
561    #The calculations here employed define the beginning of life when an individual become established.
562    #Thus, we do not consider transitions from the "prop" stages
563    lifeStages<- d$matrixClass[[index]][1]
564    output[i,"stages"]=paste0(d$matrixClass[[index]][2])
565    notProp<- min(which(lifeStages != "prop"))
566    dorm<- which(lifeStages=="dorm")
567    matU<- d$mat[[index]]$matU
568    matU[is.na(matU)] <- 0
569    matF<- d$mat[[index]]$matF
570    matF[is.na(matF)] <- 0
571    matC<- d$mat[[index]]$matC
572    matC[is.na(matC)] <- 0
```

```
573 matA<- matU+matF+matC
574 #Store matrix dimension
575 output$MatrixDimension[i]=matDim=dim(matU)[1]
576 #Convergence to the quasi-stationary distribution
577 QSD <- qsdConvergence(matU,notProp)
578 #Calculate the life table
579 lifeTable <- makeLifeTable(matU,matF,matC,notProp,1000)[1:QSD[2],]
580 #Calculate and store Age at sexual maturity La
581 La <- output[i, "La"] <- lifeTimeRepEvents(matU,matF,notProp)
582 #Survival curve
583 output[i,"lx"][[1]] <- list(unlist(lifeTable$lx[1:QSD[2]]))
584 #Survival with the beginning of lx set at age at maturity
585 output[i,"lxs"][[1]] <- list(unlist(lifeTable$lx)[La:QSD[2]])
586 #Fertility curve
587 output[i,"mx"][[1]] <- list(unlist(lifeTable$mx)[1:QSD[2]])
588 #Fertility curve setting the beginning at age at maturity
589 output[i,"mxs"][[1]] <- list(unlist(lifeTable$mx)[La:QSD[2]])
590 #Define age
591 output[i,"x"][[1]] <- list(unlist(lifeTable$x)[1:QSD[2]])
592 #Define age since starting at age at maturity
593 output[i,"xs"][[1]] <- list(unlist(lifeTable$x)[La:QSD[2]])
594 #Keyfitz' entropy estimation
595 output$H[i] <- as.numeric(-
596 t(lx[is.na(lx)==FALSE])%*%log(lx[is.na(lx)==FALSE])/sum(lx[is.na(lx)==FALSE]))
597 }
598
```

599 **Source data**

600 COMADRE\_v.3.0.0 (as file)

601 COMPADRE\_v.5.0.0 (as file)

602
